# Supplementary material for: Multi-model study of HTAP II on sulphur and nitrogen deposition
Source: Copernicus journal article supplement (doi:10.5194/acp-2017-1121), 2018-01-03
Supplement: Supplementary file 1 [file acp-2017-1121-supplement.pdf]

Supplementary

Fig. S1

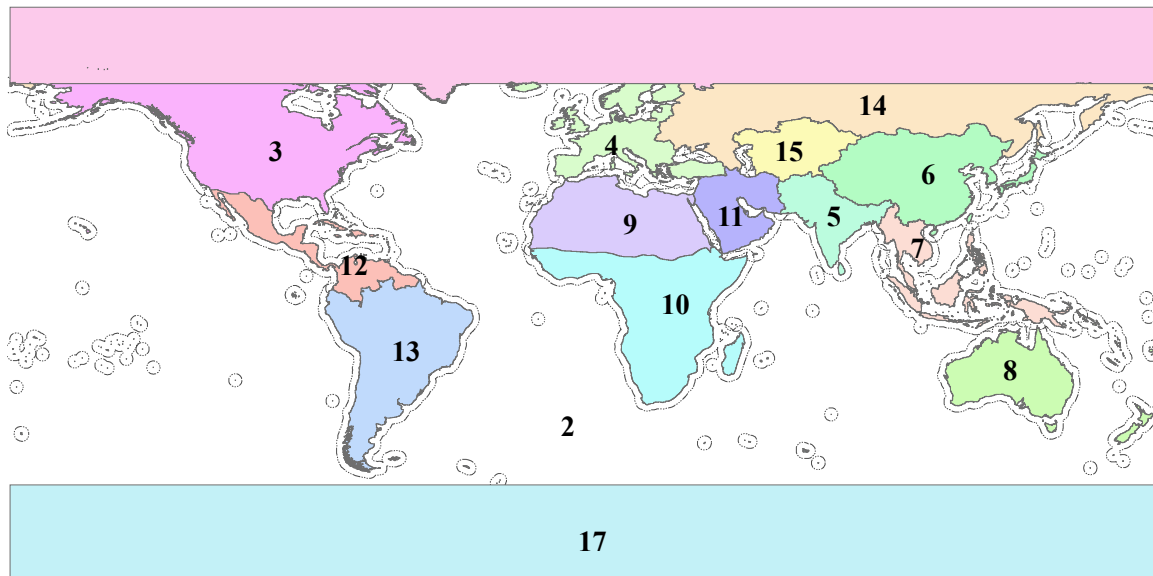

Fig. S1. Regions defined in HTAP phase II and coastal area. Region 1-Global, 2-Ocean (include Arctic), 3-North America, 4-Europe, 5-South Asia, 6-East Asia, 7-Southeast Asia, 8-Australia, 9-North Africa, 10- Sub Saharan Africa, 11-Middle East, 12- Mexico, Central America, Caribbean, Guyanas, Venezuela, Columbia (Central America), 13-South America, 14-Russia, Belarussia, Ukraine (RBU), 15-Central Asia, 17-Antarctic.

Fig. S2

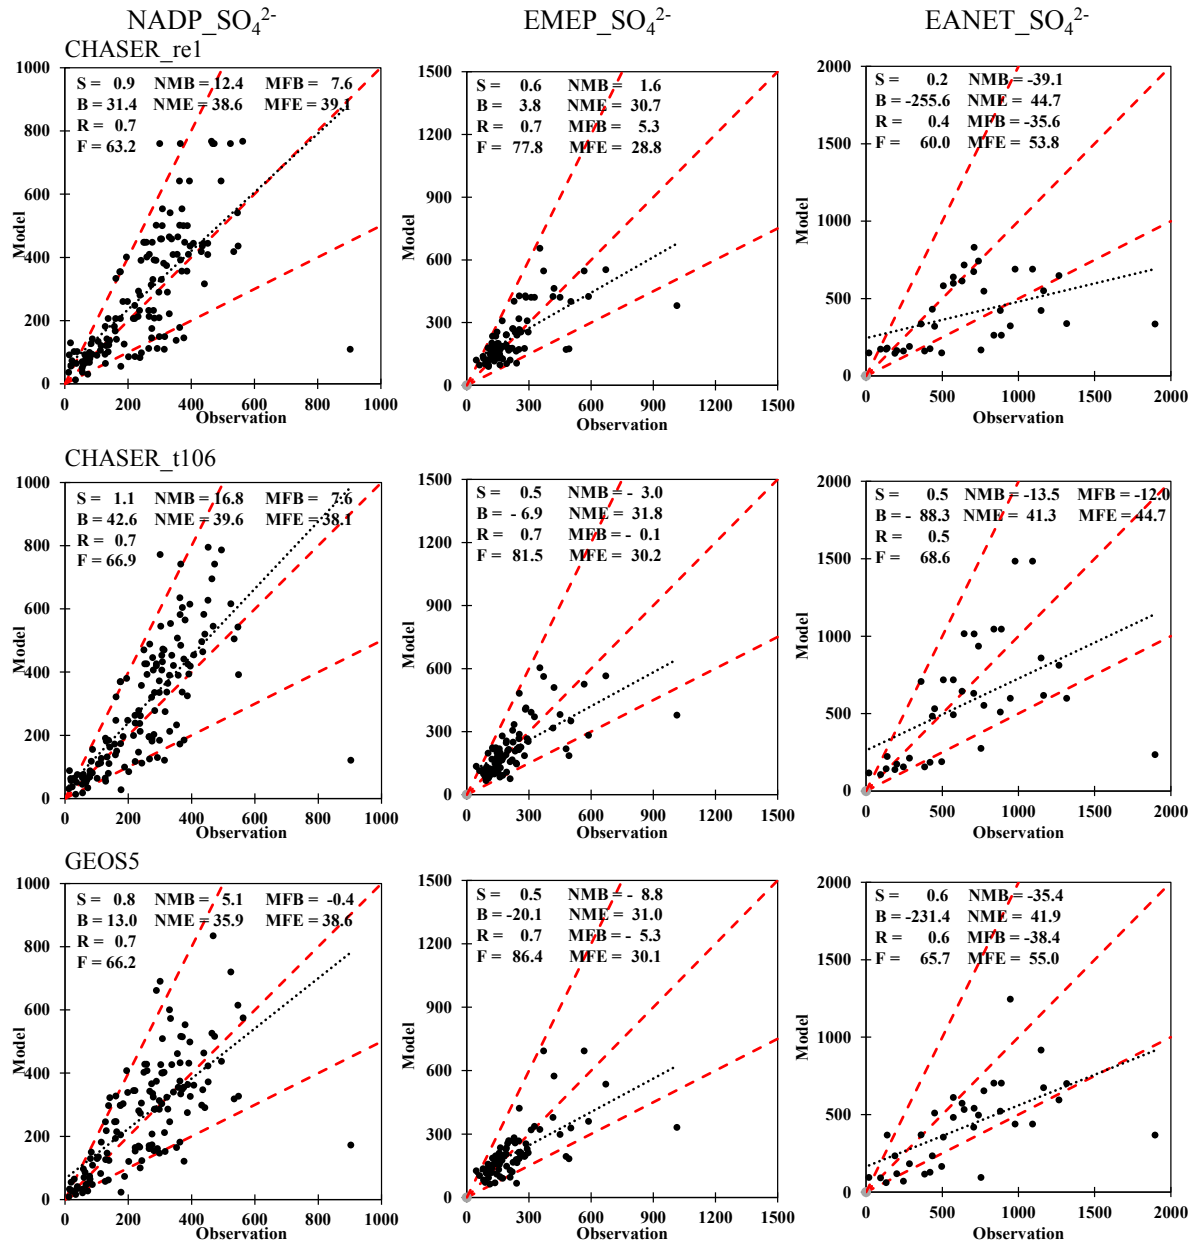

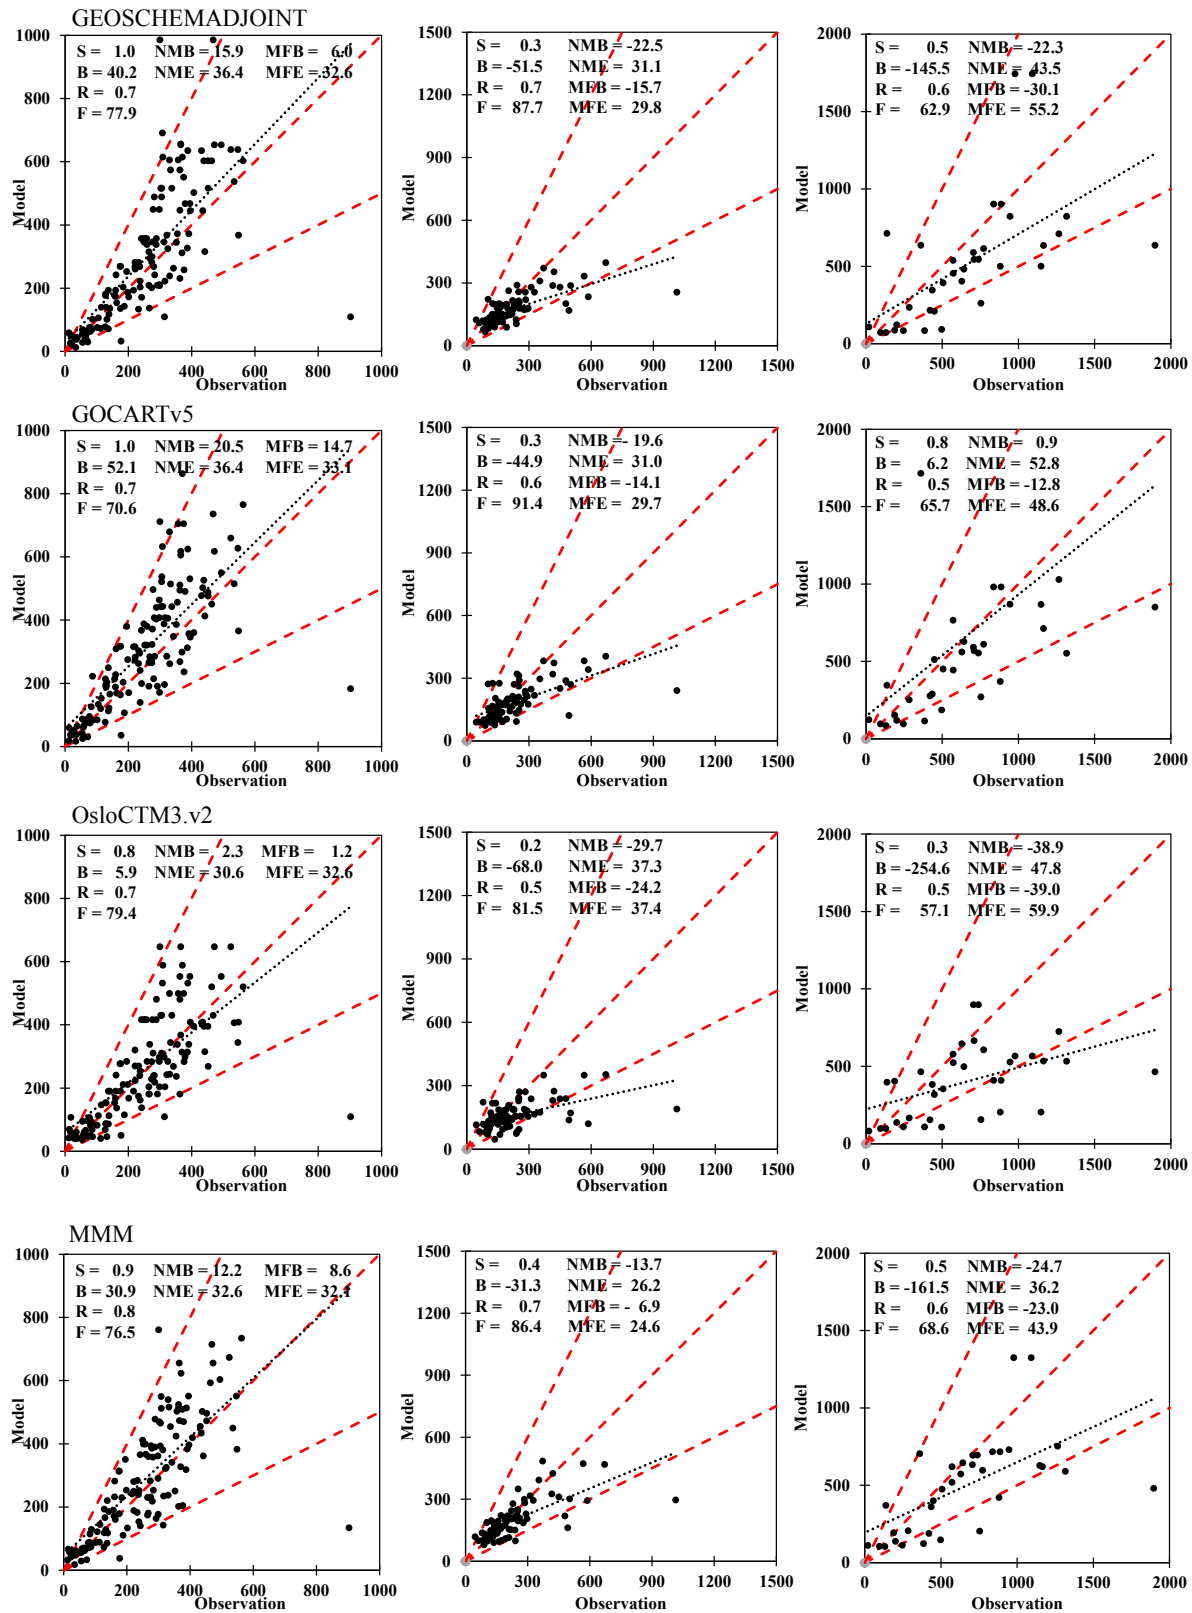

Fig. S2. Individual model performances on  $\text{SO}_4^{2-}$  wet deposition ( $\text{mg (S) m}^{-2}\text{yr}^{-1}$ ). The model result is the annual deposition in 2010 and the observation is 3-year average annual data of 2009-2011.

Fig. S3

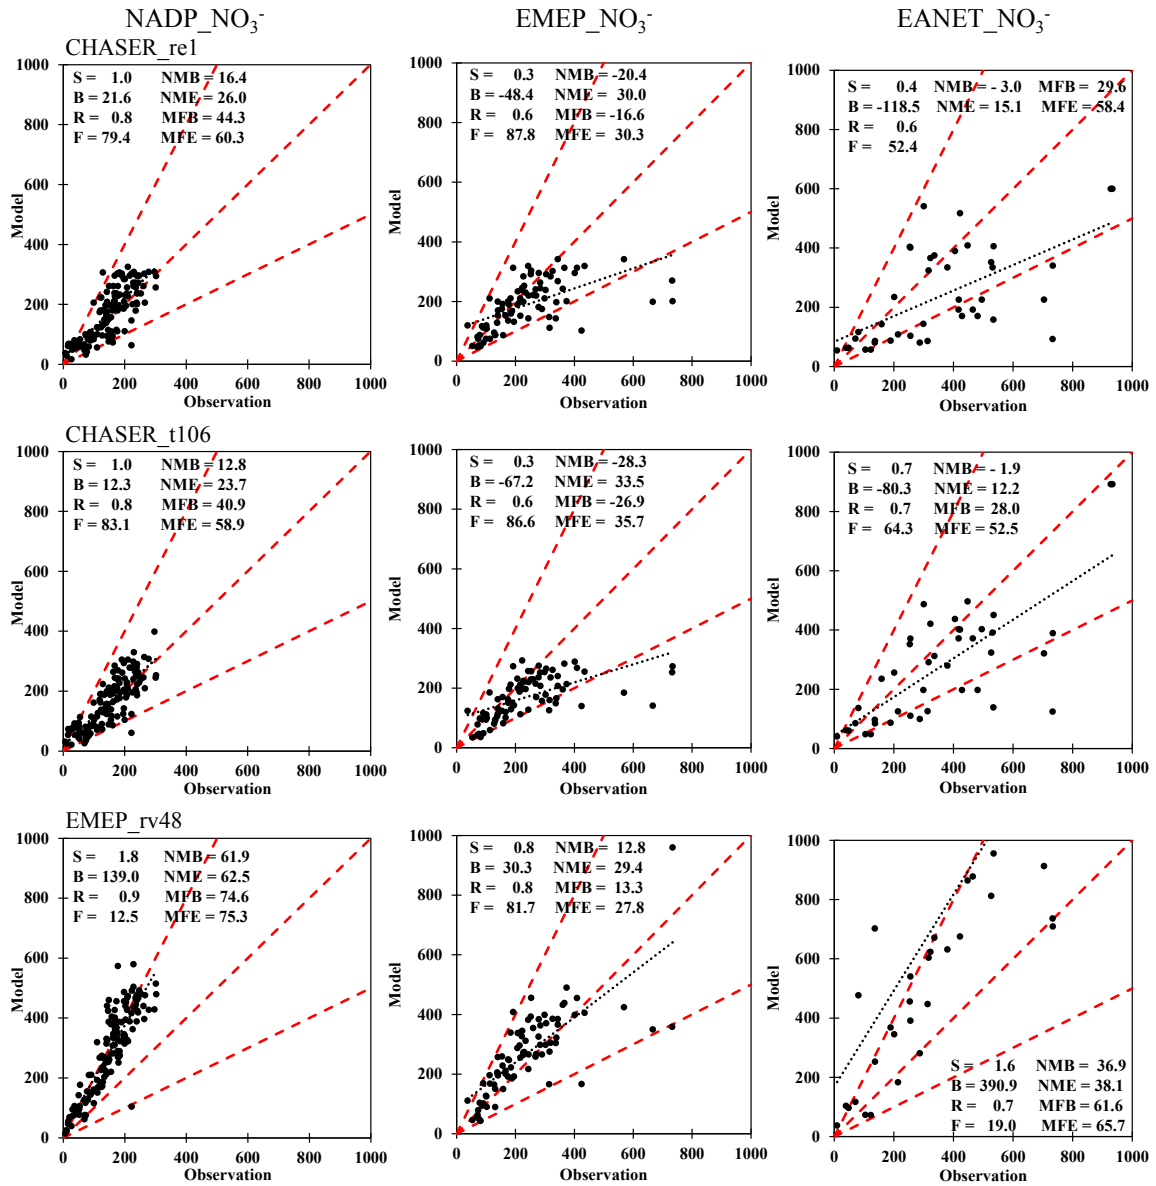

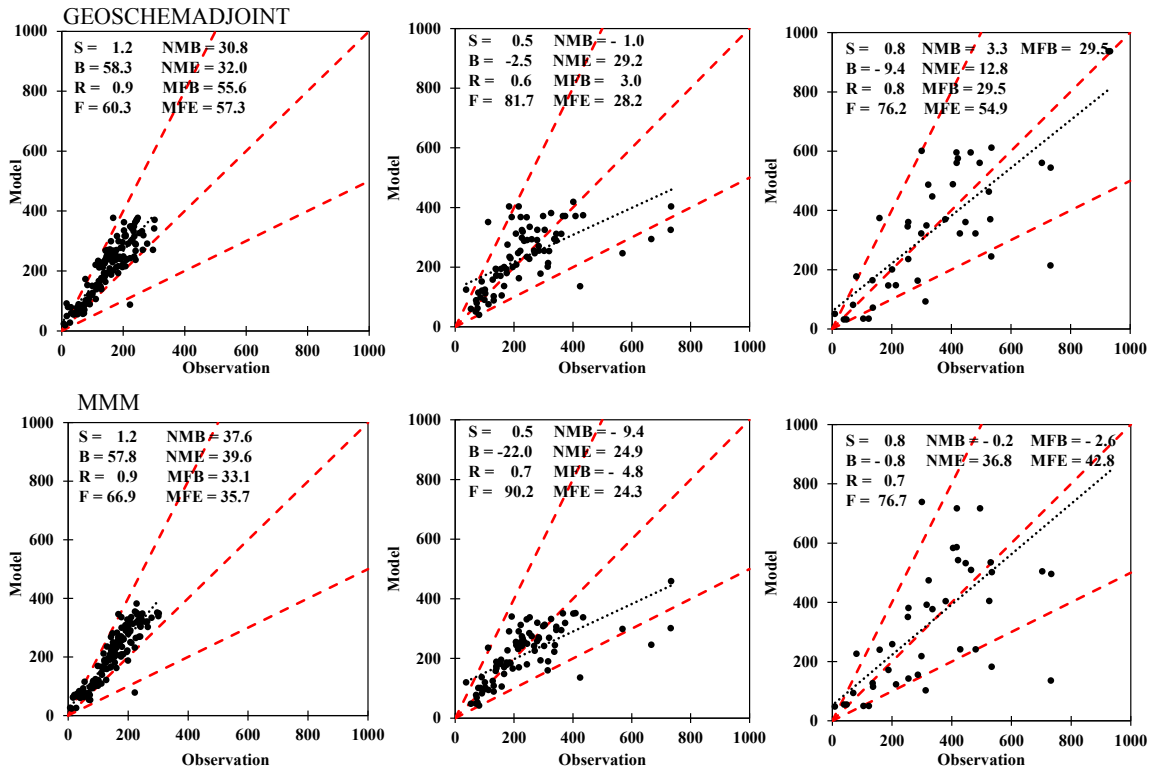

Fig. S3. Same as Fig. S2 but for  $\text{NO}_3^-$  wet deposition ( $\text{mg (N) m}^{-2}\text{yr}^{-1}$ )

Fig. S4

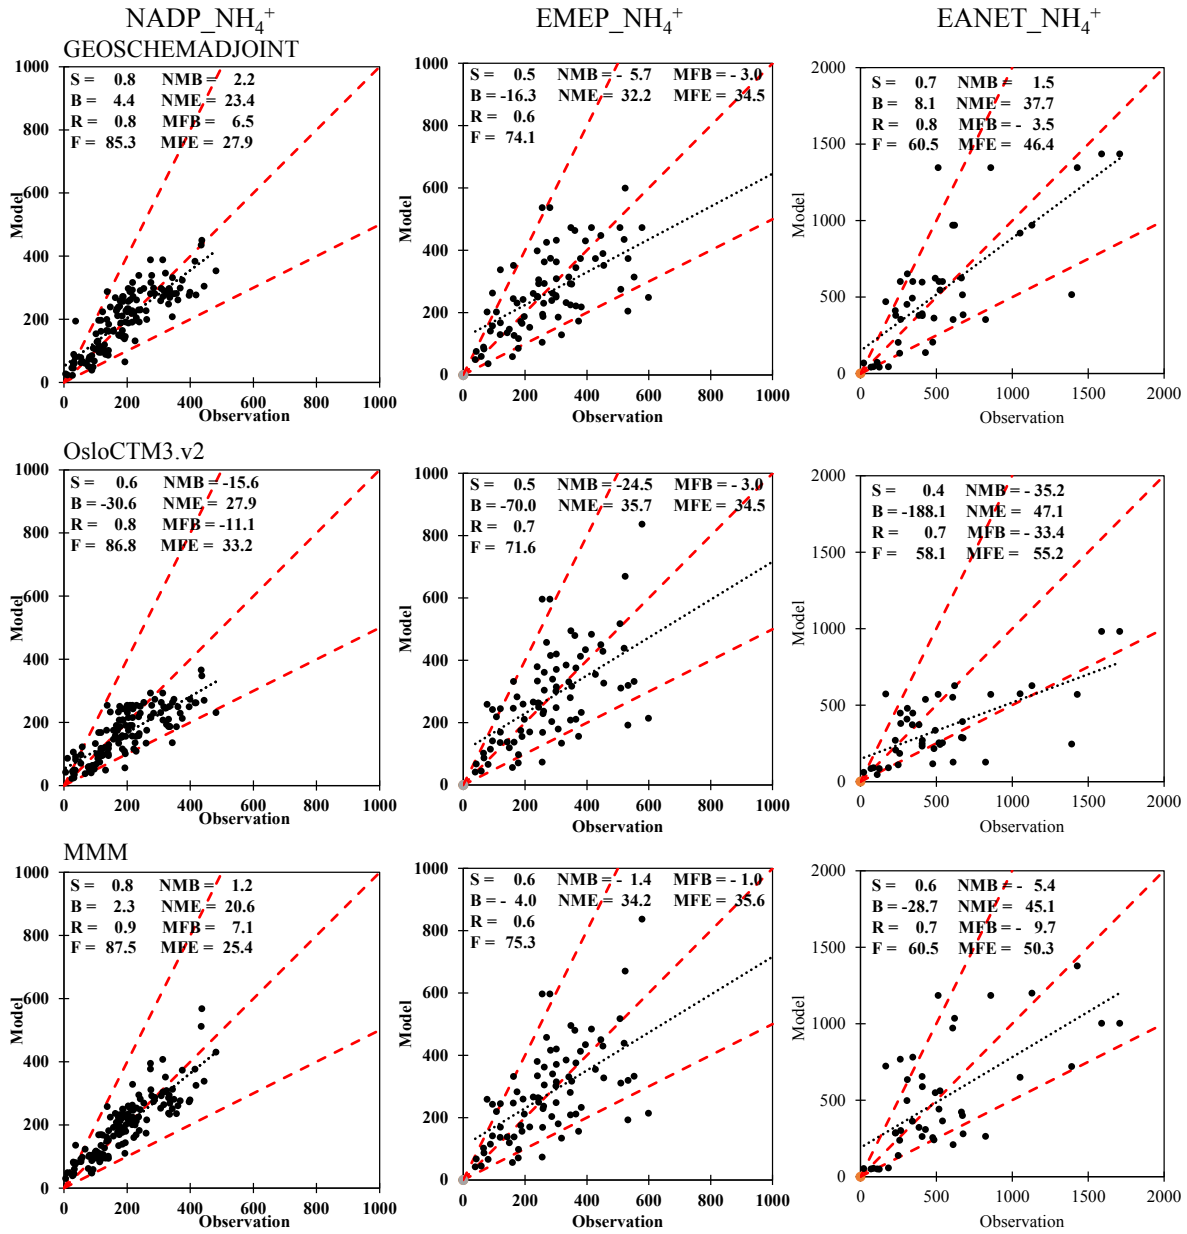

Fig. S4 Same as Fig. S2 but for  $\text{NH}_4^+$  wet deposition ( $\text{mg (N) m}^{-2}\text{yr}^{-1}$ )

Fig. S5

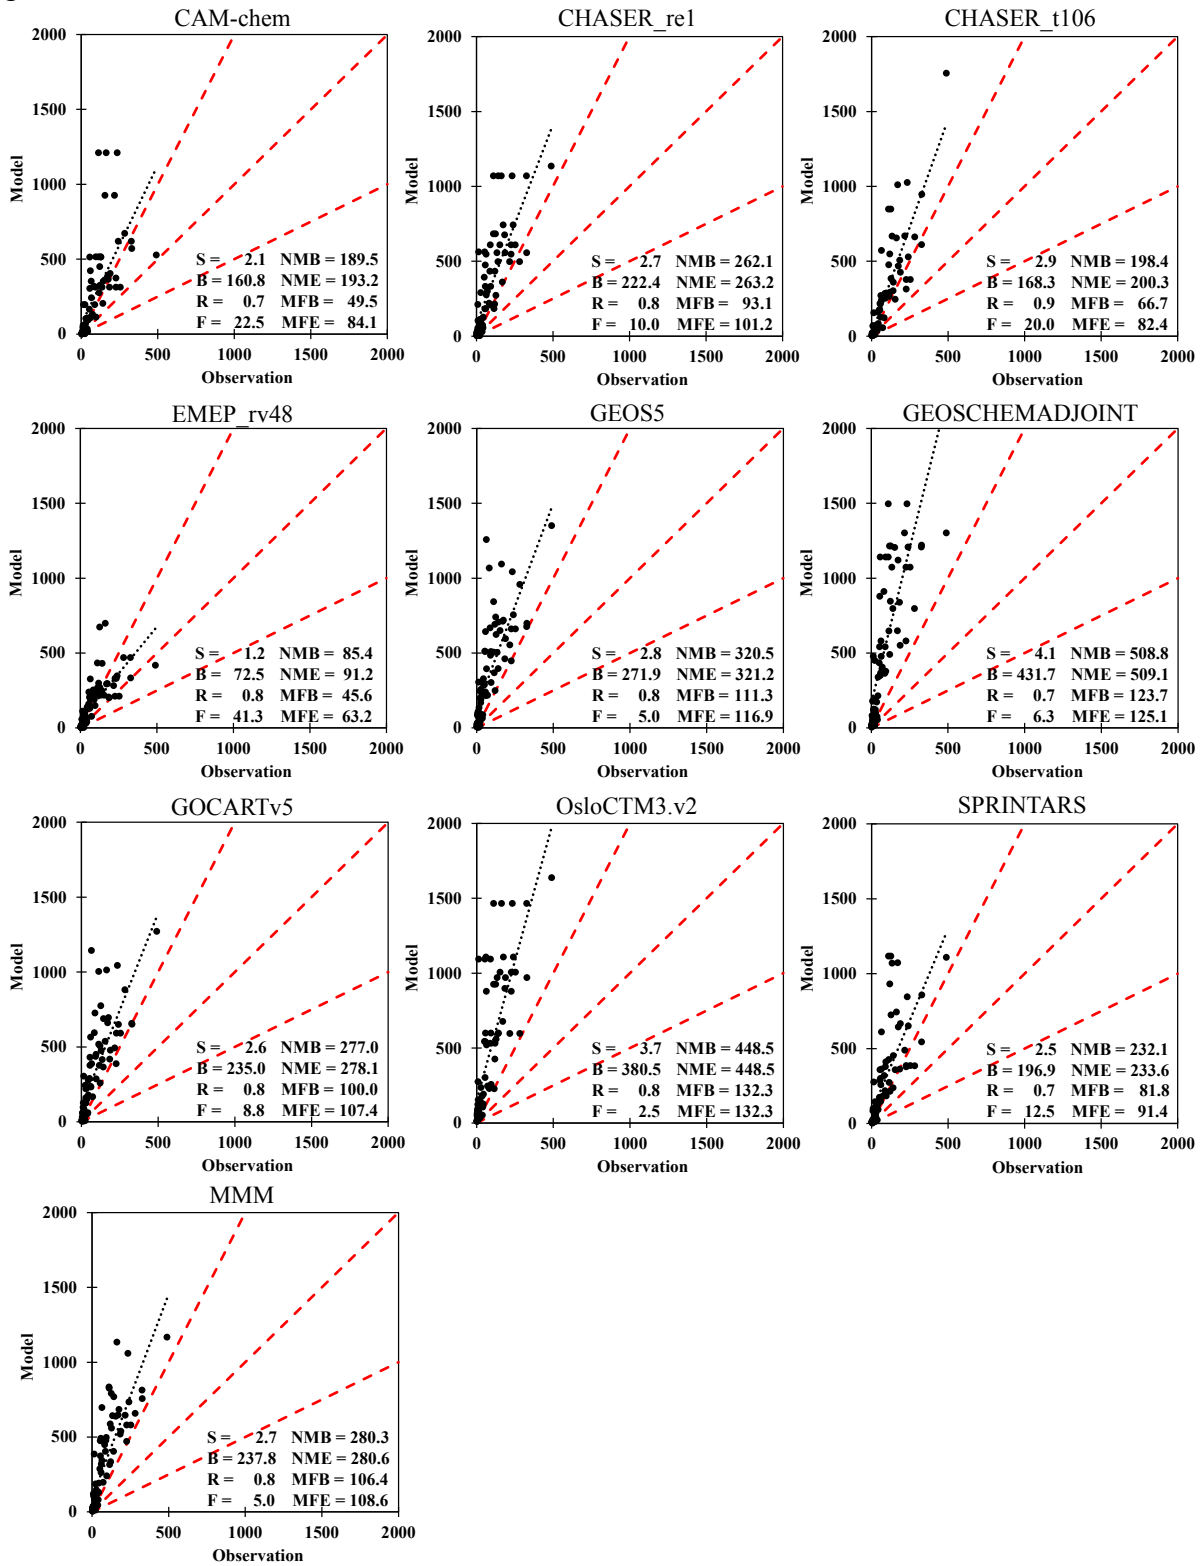

Fig. S5. Individual model performances on SO<sub>2</sub> dry deposition ( $\text{mg}(\text{S}) \text{m}^{-2}\text{yr}^{-1}$ ). The model result is the annual deposition in 2010 and the observation is 3-year average annual data of 2009-2011.

Fig. S6

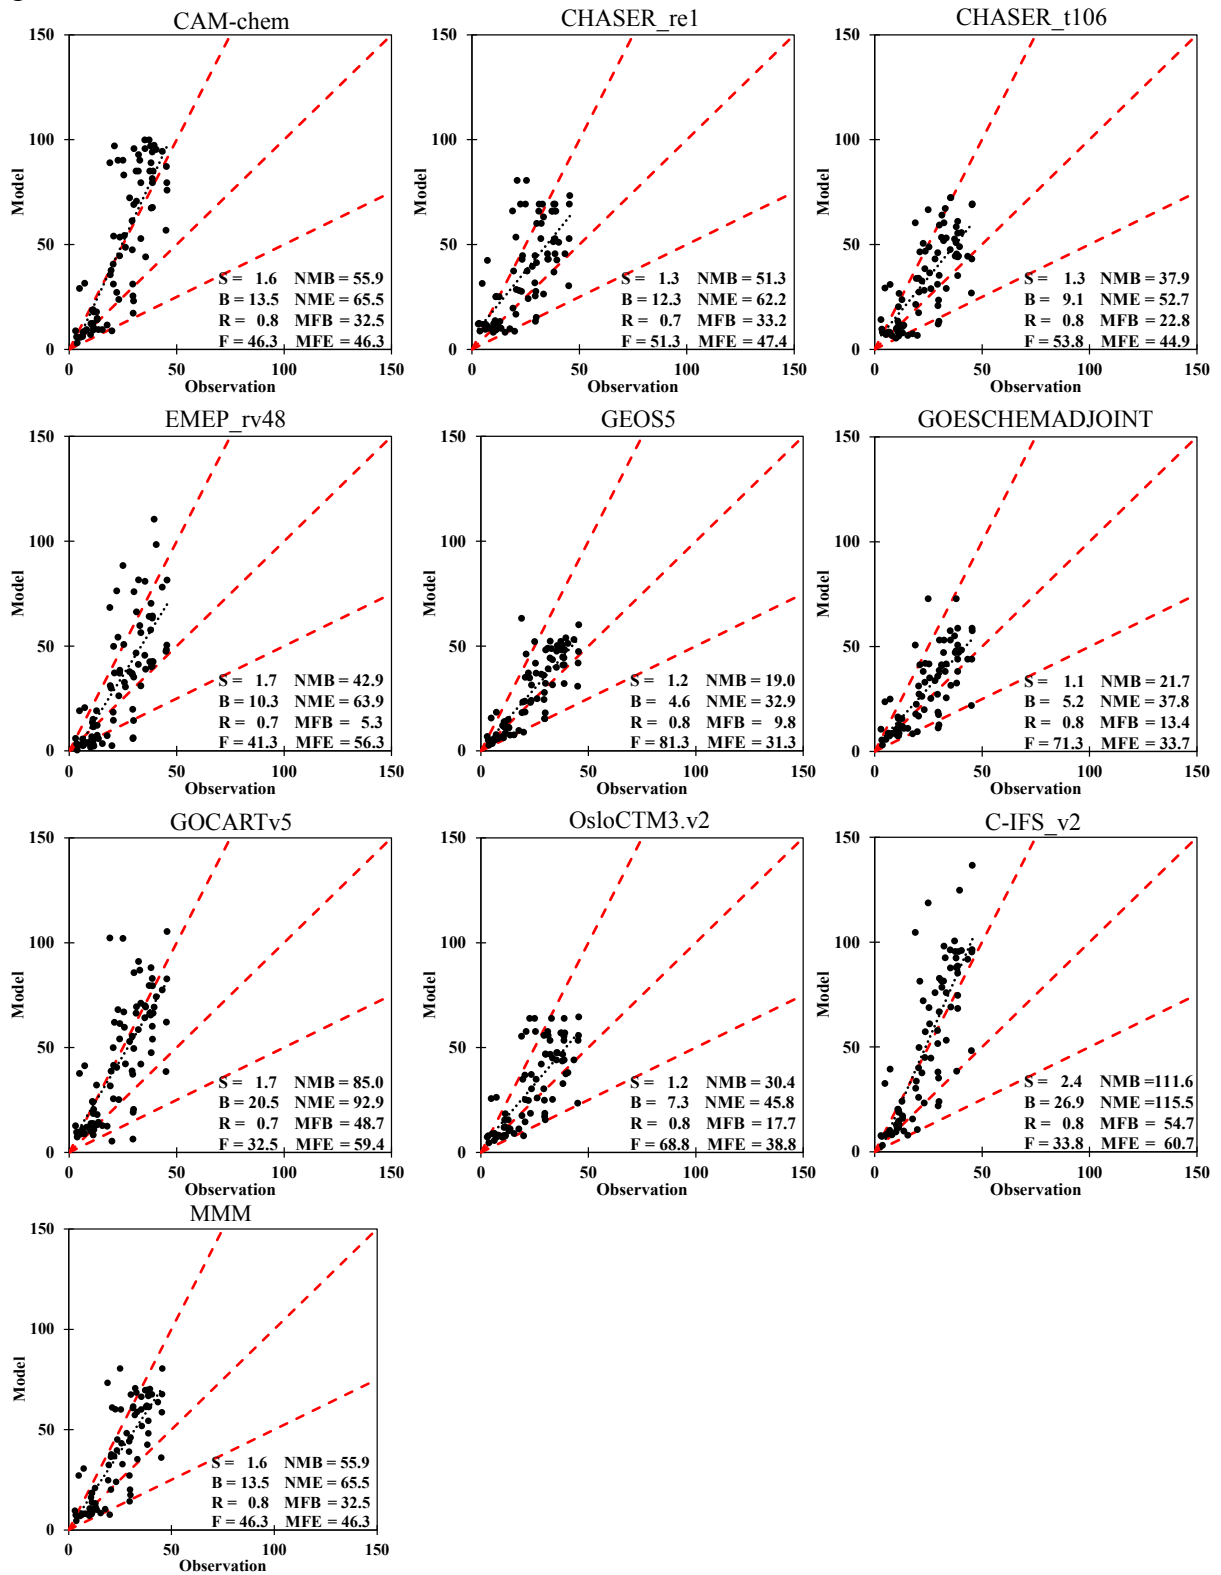

Fig. S6. Same as Fig. S5 but for  $\text{SO}_4^{2-}$  dry deposition ( $\text{mg (S) m}^{-2}\text{yr}^{-1}$ )



Fig. S7

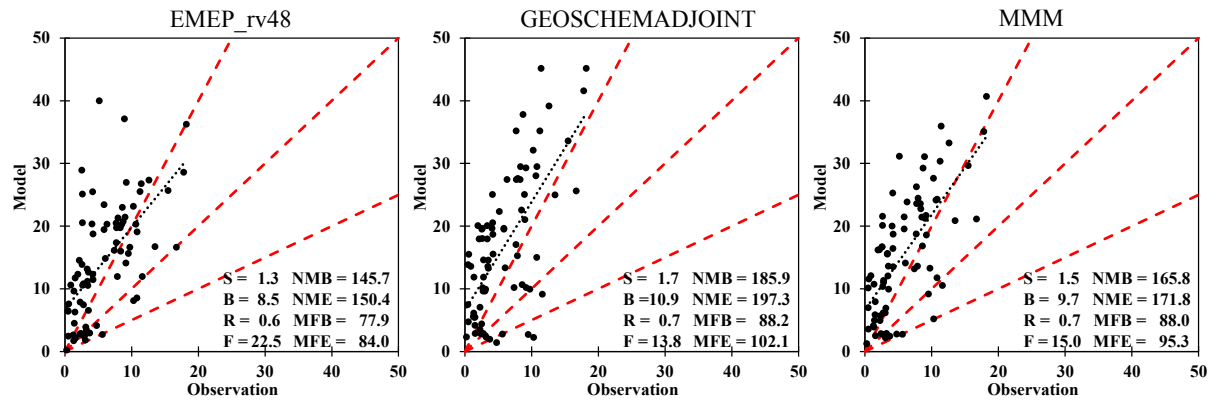

Fig. S7. Same as Fig. S5 but for  $\text{NO}_3^-$  dry deposition ( $\text{mg (N) m}^{-2}\text{yr}^{-1}$ )

Fig. S8

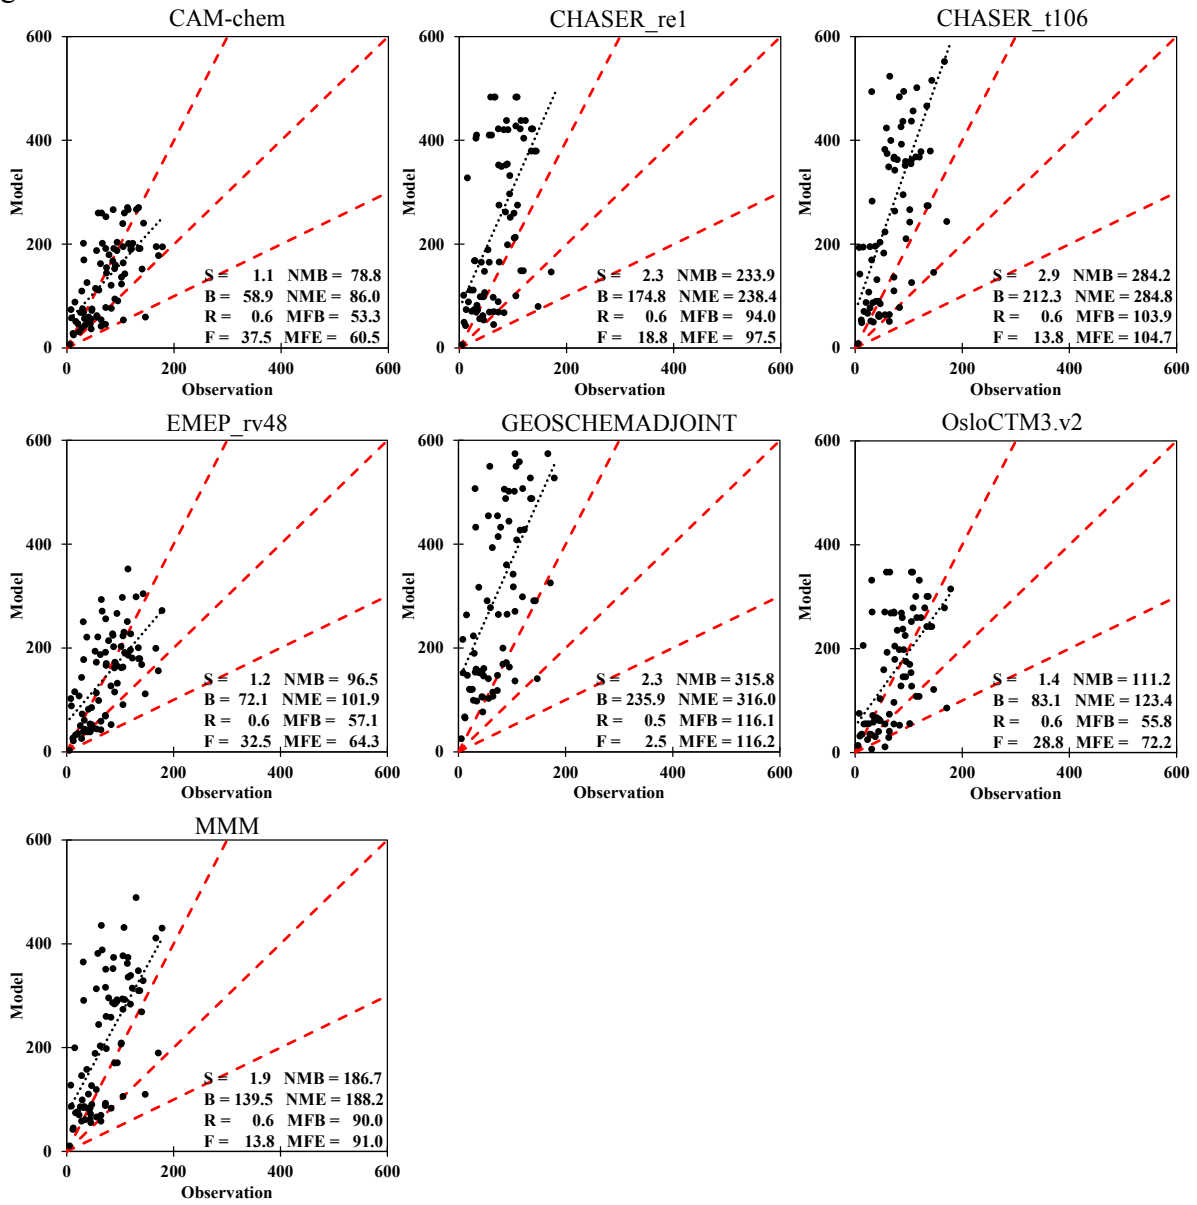

Fig. S8. Same as Fig. S5 but for  $\text{HNO}_3$  dry deposition ( $\text{mg(N) m}^{-2}\text{yr}^{-1}$ )

Fig. S9

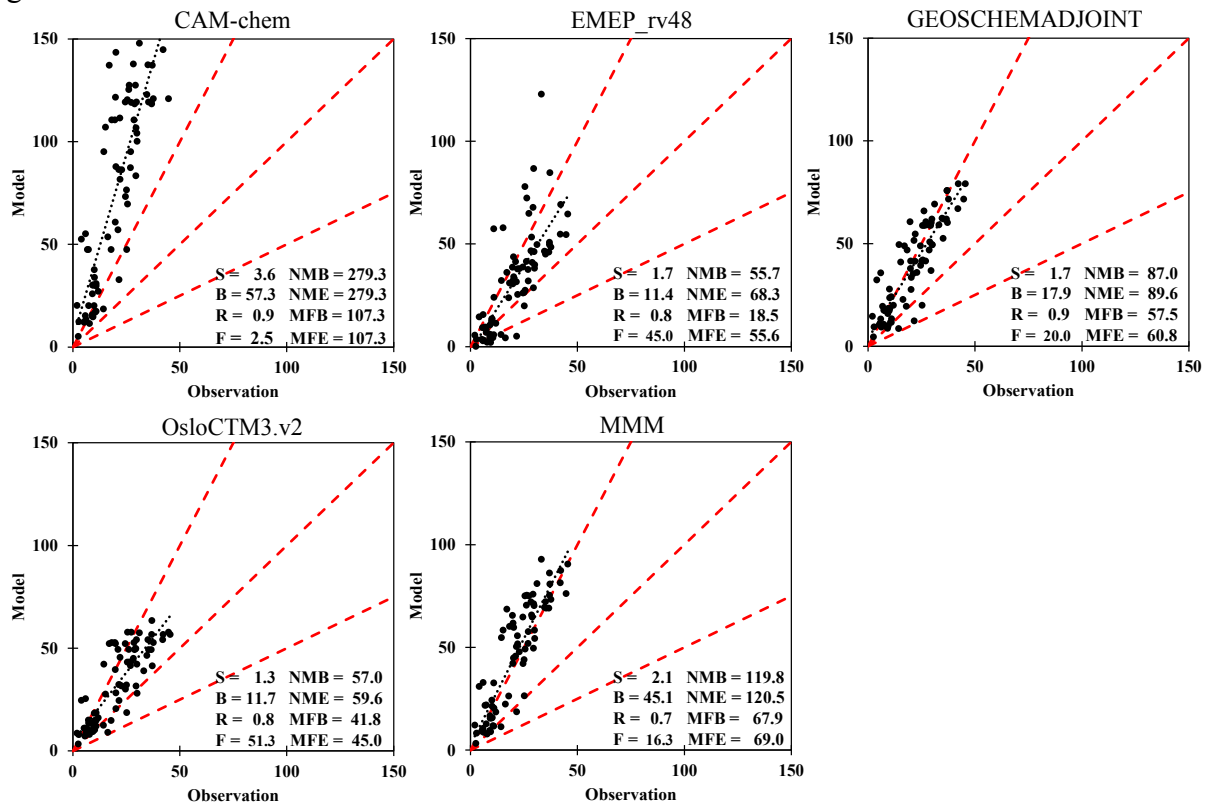

Fig. S9. Same as Fig. S5 but for  $\text{NH}_4^+$  dry deposition ( $\text{mg (N) m}^{-2}\text{yr}^{-1}$ )

Fig. S10

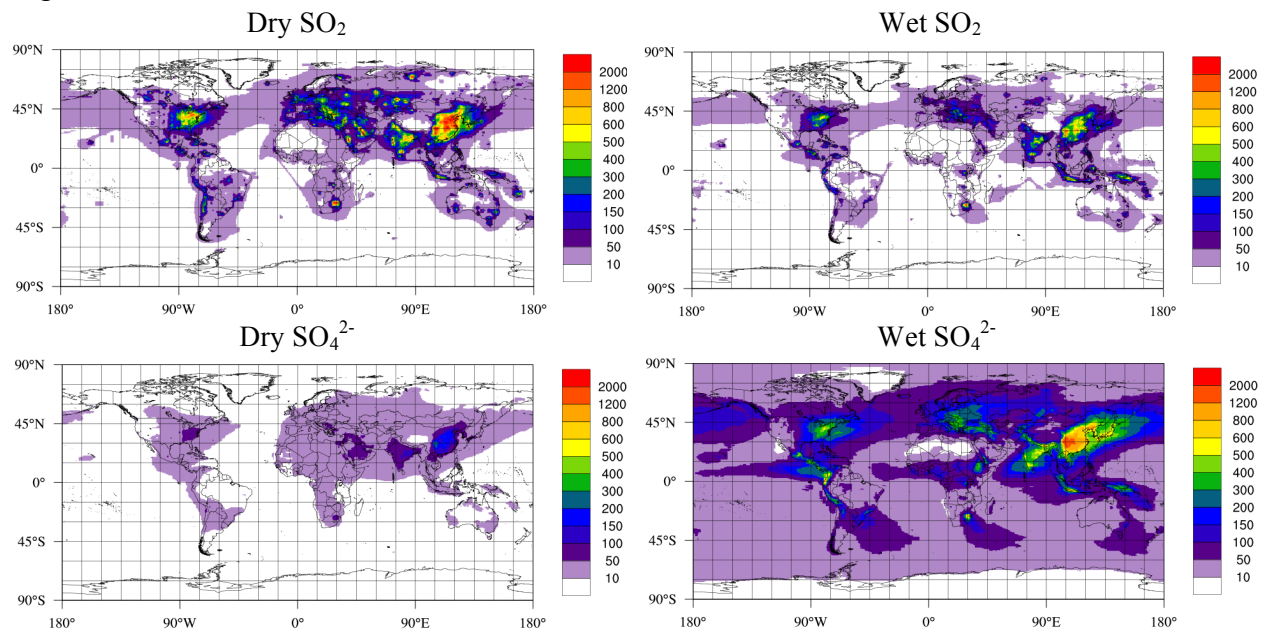

Fig. S10 Spatial distribution of SO<sub>2</sub> and SO<sub>4</sub><sup>2-</sup> deposition in 2010 from MMM results ( $\text{mg(S) m}^{-2}\text{yr}^{-1}$ ).

Fig. S11

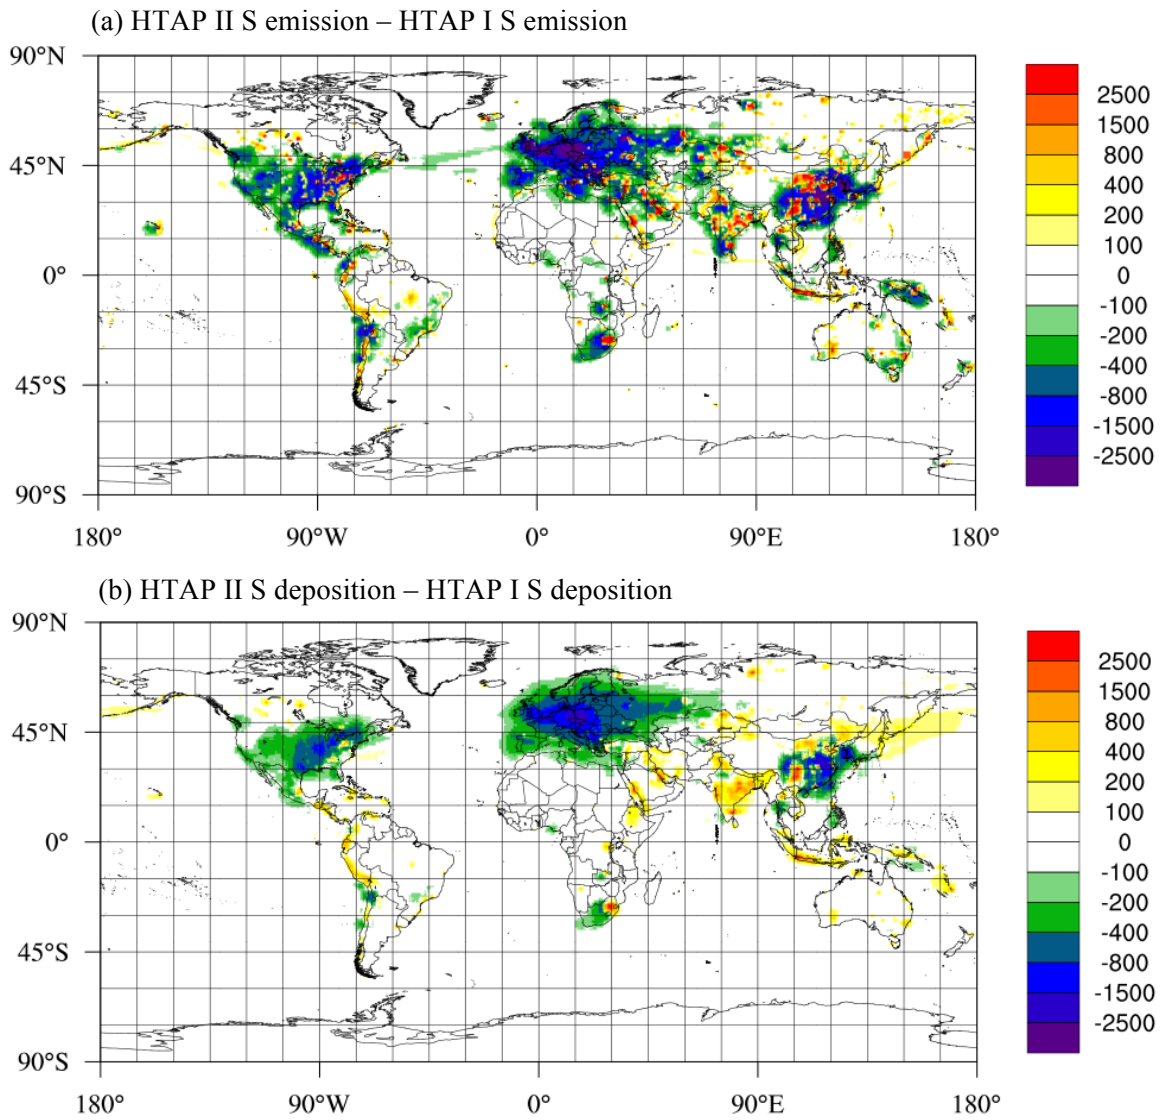

Fig. S11 Difference between MMM of HTAP II and HTAP I for (a) S emission (b) S Deposition. Unit:  $\text{mg(S)} \text{ m}^{-2} \text{ yr}^{-1}$ .

Fig. S12

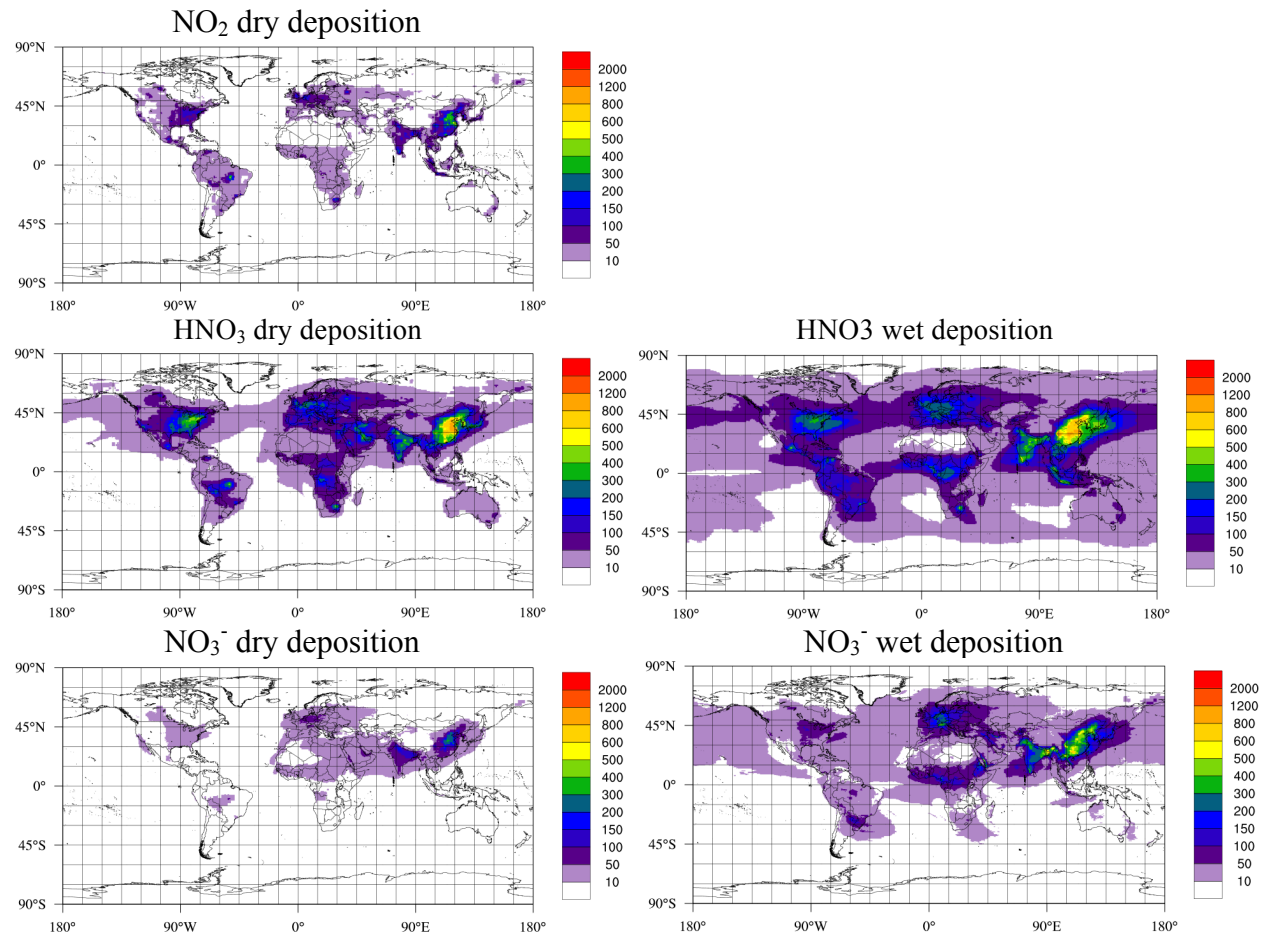

Fig. 12 Spatial distributions of NO<sub>2</sub>, HNO<sub>3</sub> and NO<sub>3</sub><sup>-</sup> deposition in 2010 from MMM results ( $\text{mg(N) m}^{-2}\text{yr}^{-1}$ ).

Fig. S13

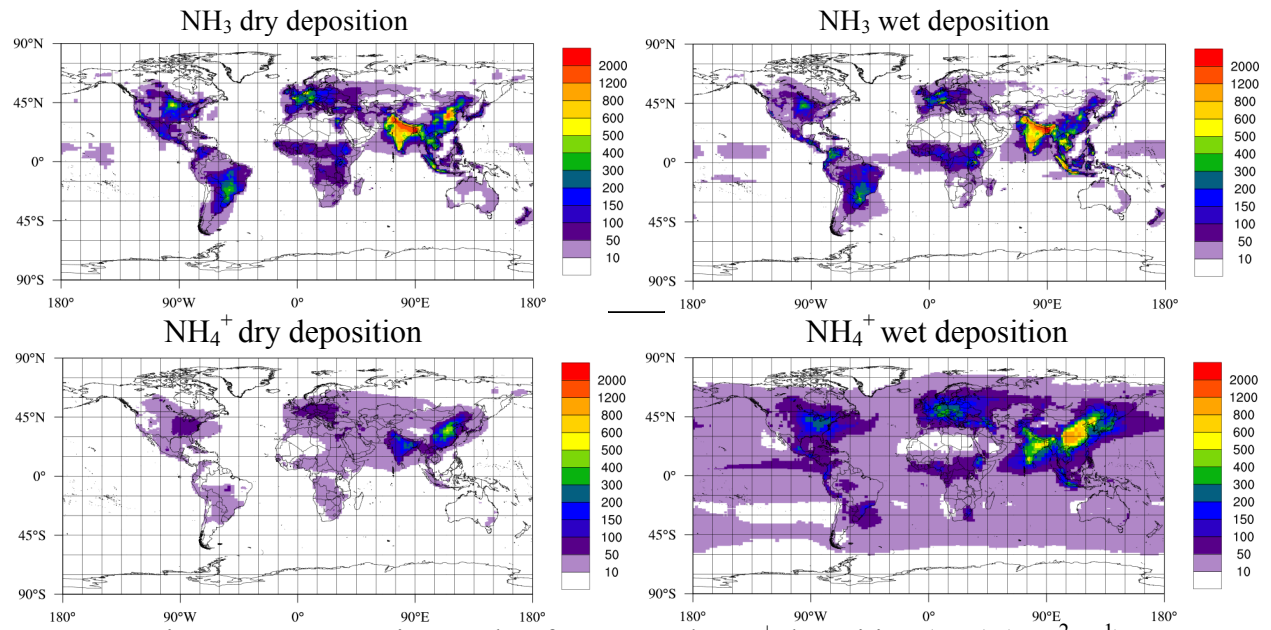

Fig. S13 Same as Fig. S12 but for  $\text{NH}_3$  and  $\text{NH}_4^+$  deposition ( $\text{mg(N) m}^{-2}\text{yr}^{-1}$ )

Fig. S14

(a) HTAP II N emission – HTAP I N emission

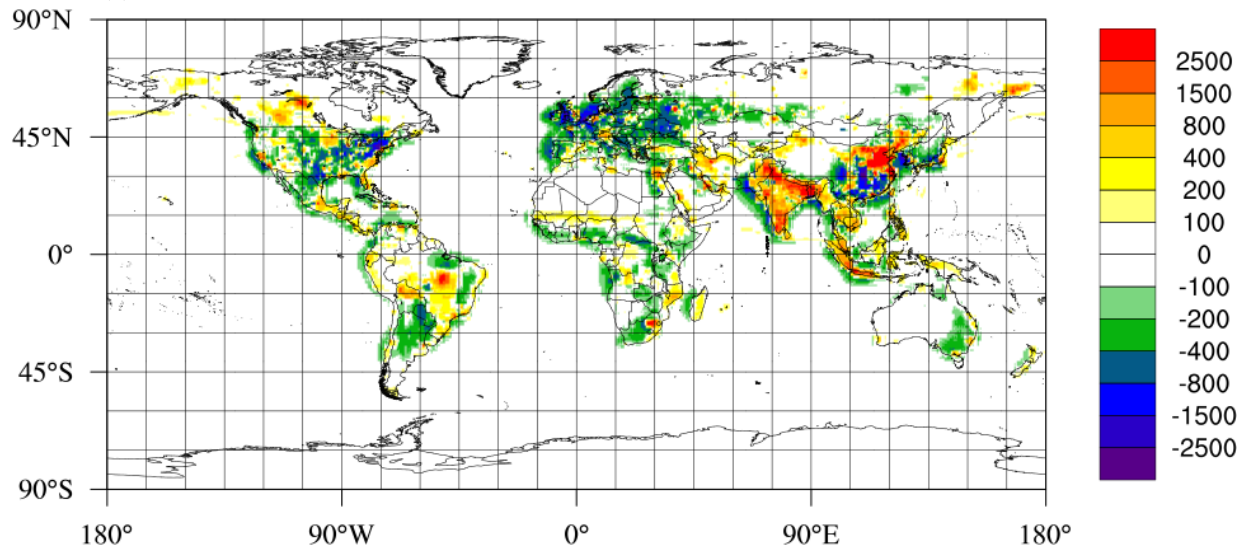

(b) HTAP II N deposition – HTAP I N deposition

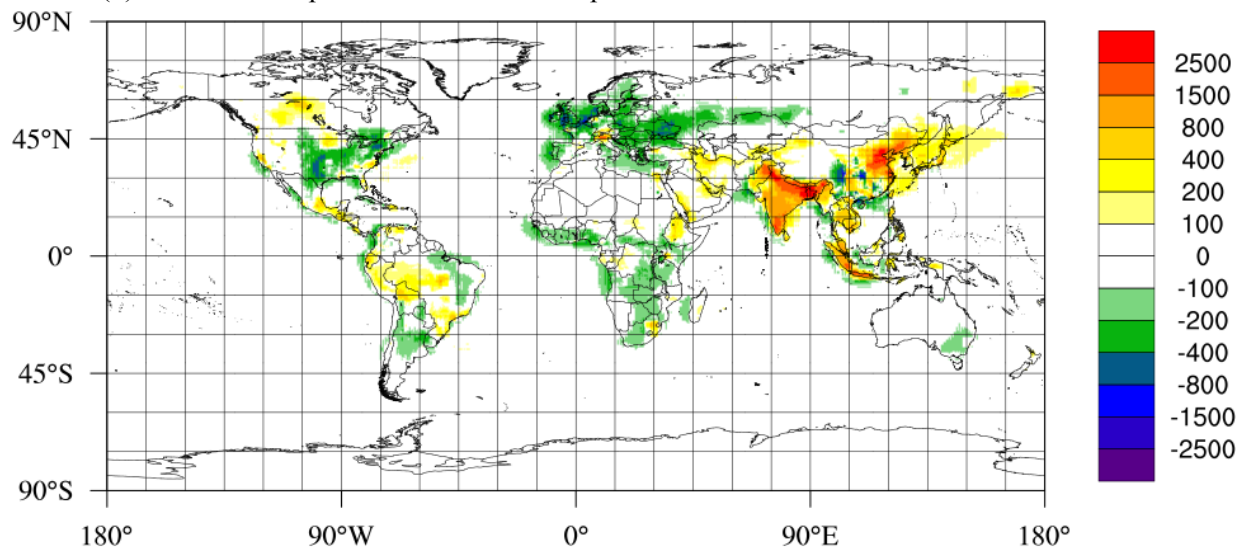

Fig. S14 Difference between MMM of HTAP II and HTAP I for (a) N emission (b) N Deposition. Unit: mg(N) m<sup>-2</sup> yr<sup>-1</sup>



Fig. S15

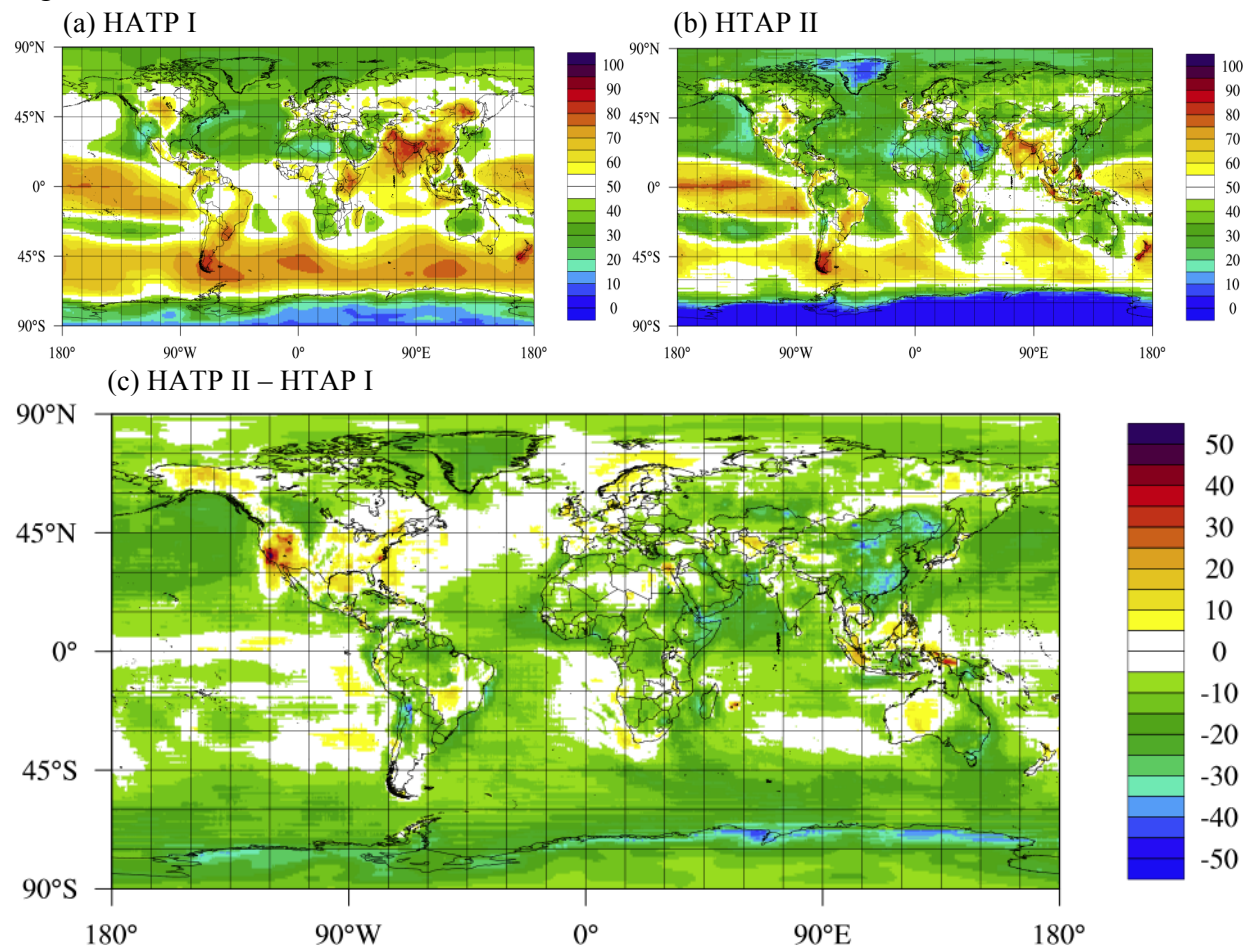

Fig. S15 Ratio of  $\text{NH}_x$  deposition in N ( $\text{NO}_y + \text{NH}_x$ ) deposition from MMM results of (a) HTAP I (b) HTAP II. (c) HTAP II – HTAP I. Unit: %.

Table S1

Table S1. Summary of Global Total Deposition and Emission of S in 2010 (Tg(S) yr<sup>-1</sup>)

| Model/Species   | Dry deposition | Wet deposition | Total Deposition | Emission surface SO <sub>2</sub> | Emission surface SO <sub>4</sub> <sup>2-</sup> | Emission DMS | Total Emission |
|-----------------|----------------|----------------|------------------|----------------------------------|------------------------------------------------|--------------|----------------|
| CAM-chem        | 18             | -              | -                | 55                               | -                                              | 28           | 83             |
| CHASER_re1      | 25             | 54             | 79               | 55                               | -                                              | 25           | 80             |
| CHASER_t106     | 23             | 53             | 77               | 55                               | -                                              | 23           | 78             |
| EMEP_rv48       | 16             | 42             | 58               | -                                | -                                              | -            | -              |
| GEMMACH         | -              | -              | -                | 66                               | -                                              | -            | -              |
| GEOS5           | 34             | 43             | 77               | 53                               | 2                                              | 31           | 85             |
| GEOSCHEMADJOINT | 32             | 52             | 85               | 62                               | 1                                              | -            | -              |
| OsloCTM3.v2     | 40             | 63             | 103              | 77                               | 2                                              | -            | -              |
| GOCARTv5        | 29             | 47             | 76               | 66                               | 2                                              | -            | -              |
| SPRINTARS       | 26             | -              | -                | 60                               | 1                                              | 22           | 84             |
| C-IFS_v2        | -              | -              | -                | 77                               | -                                              | -            | 77             |
| Multimodel mean | 28             | 56             | 84               | 55                               | 1                                              | 27           | 91             |

Note: S deposition is the sum of SO<sub>2</sub>, SO<sub>4</sub><sup>2-</sup>, Methanesulfonic acid (MSA) and Dimethyl sulfide (DMS) deposition. S emission is the sum of SO<sub>2</sub>, SO<sub>4</sub><sup>2-</sup> (sulfate dry aerosol particles due to emission) and Dimethyl sulfide (DMS) emission.

Table S2

Table S2. Summary of Global Total Deposition and Emission of NO<sub>y</sub> in 2010 (Tg(N) yr<sup>-1</sup>)

| Model/Species   | Dry deposition | Wet deposition | Total Deposition | Emis NO <sub>x</sub> | Emis INO <sub>x</sub> | Total Emission |
|-----------------|----------------|----------------|------------------|----------------------|-----------------------|----------------|
| CAM-chem        | 16             | -              | -                | -                    | 4                     | -              |
| CHASER_re1      | 23             | 28             | 51               | 57                   | 4                     | 60             |
| CHASER_t106     | 25             | 27             | 52               | 58                   | 5                     | 63             |
| EMEP_rv48       | 15             | 45             | 59               | -                    | -                     | -              |
| GEMMACH         | -              | -              | -                | 44                   | -                     | 44             |
| GEOSCHEMADJOINT | 26             | 28             | 54               | 54                   | -                     | 54             |
| OsloCTM3.v2     | 25             | -              | -                | 51                   | -                     | 51             |
| Multimodel mean | 22             | 38             | 59               | 57                   | 4                     | 60             |

Note: NO<sub>y</sub> deposition is the sum of all simulated oxidized nitrogen species (expressed as nitrogen) including NO, NO<sub>2</sub>, HNO<sub>3</sub>, HNO<sub>4</sub>, NO<sub>3</sub>aerosol, NO<sub>3</sub>(radical), N<sub>2</sub>O<sub>5</sub>, Peroxyacyl nitrates (PAN), other organic nitrates other than PAN, but not N<sub>2</sub>O (Orgn) deposition. NO<sub>x</sub> emission is sum of anthropogenic NO<sub>x</sub> emission, aircraft NO emission, soil NO emission and lightening NO<sub>x</sub> emission (INO<sub>x</sub>).

Table S3

Table S3. Summary of Global Total Deposition and Emission of  $\text{NH}_x$  in 2010 ( $\text{Tg(N) yr}^{-1}$ )

| Model/Species   | Dry deposition |                 | Wet deposition |                 | Total Deposition | Emission |
|-----------------|----------------|-----------------|----------------|-----------------|------------------|----------|
|                 | $\text{NH}_3$  | $\text{NH}_4^+$ | $\text{NH}_3$  | $\text{NH}_4^+$ |                  |          |
| CAM-chem        | 12             | 8               | -              | -               | -                | 54       |
| EMEP_rv48       | 11             | 3               | 13             | -               | -                | -        |
| GEOSCHEMADJOINT | 14             | 4               | 13             | 24              | 55               | 55       |
| OsloCTM3.v2     | 19             | 4               | -              | 21              | -                | 54       |
| Multimodel mean | 14             | 5               | 13             | 22              | 54               | 54       |

Note:  $\text{NH}_x$  deposition is the sum of  $\text{NH}_3$  and  $\text{NH}_4^+$  deposition.  $\text{NH}_x$  emission is  $\text{NH}_3$  emission.
