# Supplementary material for: Multi-model study of HTAP II on sulphur and nitrogen deposition
Source: Copernicus journal article supplement (doi:10.5194/acp-2017-1121), 2018-01-03
Supplement: Supplementary file [file acp-2017-1121-AC2-supplement.zip]

Supplementary

Fig. S1

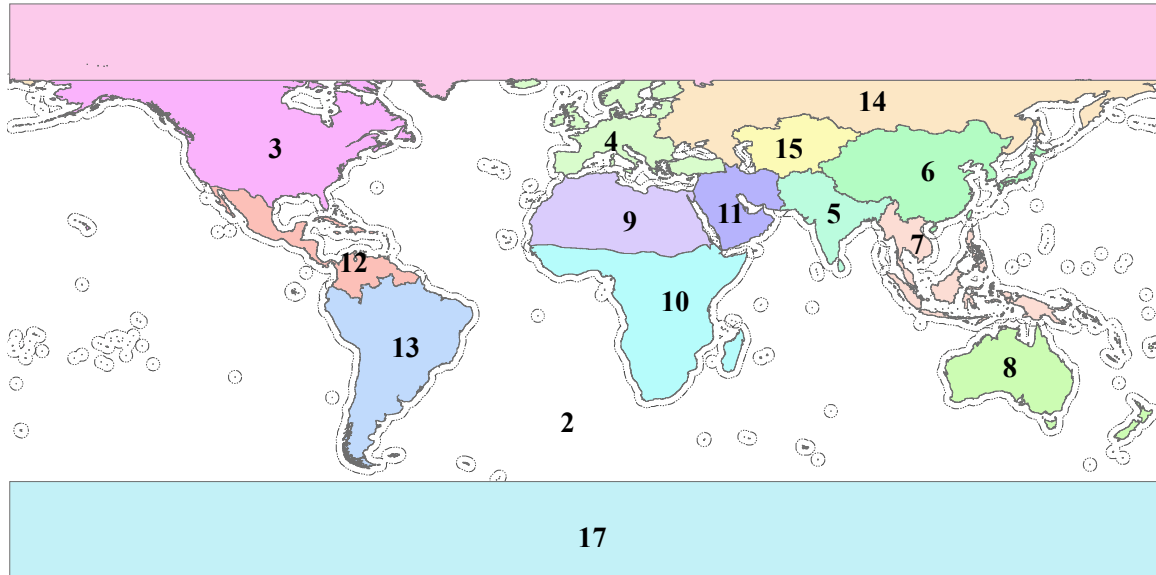

Fig. S1. Regions defined in HTAP phase II and coastal area. Region 1-Global, 2-Ocean (include Arctic), 3-North America, 4-Europe, 5-South Asia, 6-East Asia, 7-Southeast Asia, 8-Australia, 9-North Africa, 10- Sub Saharan Africa, 11-Middle East, 12- Mexico, Central America, Caribbean, Guyanas, Venezuela, Columbia (Central America), 13-South America, 14-Russia, Belarussia, Ukraine (RBU), 15-Central Asia, 17-Antarctic.

Fig. S2

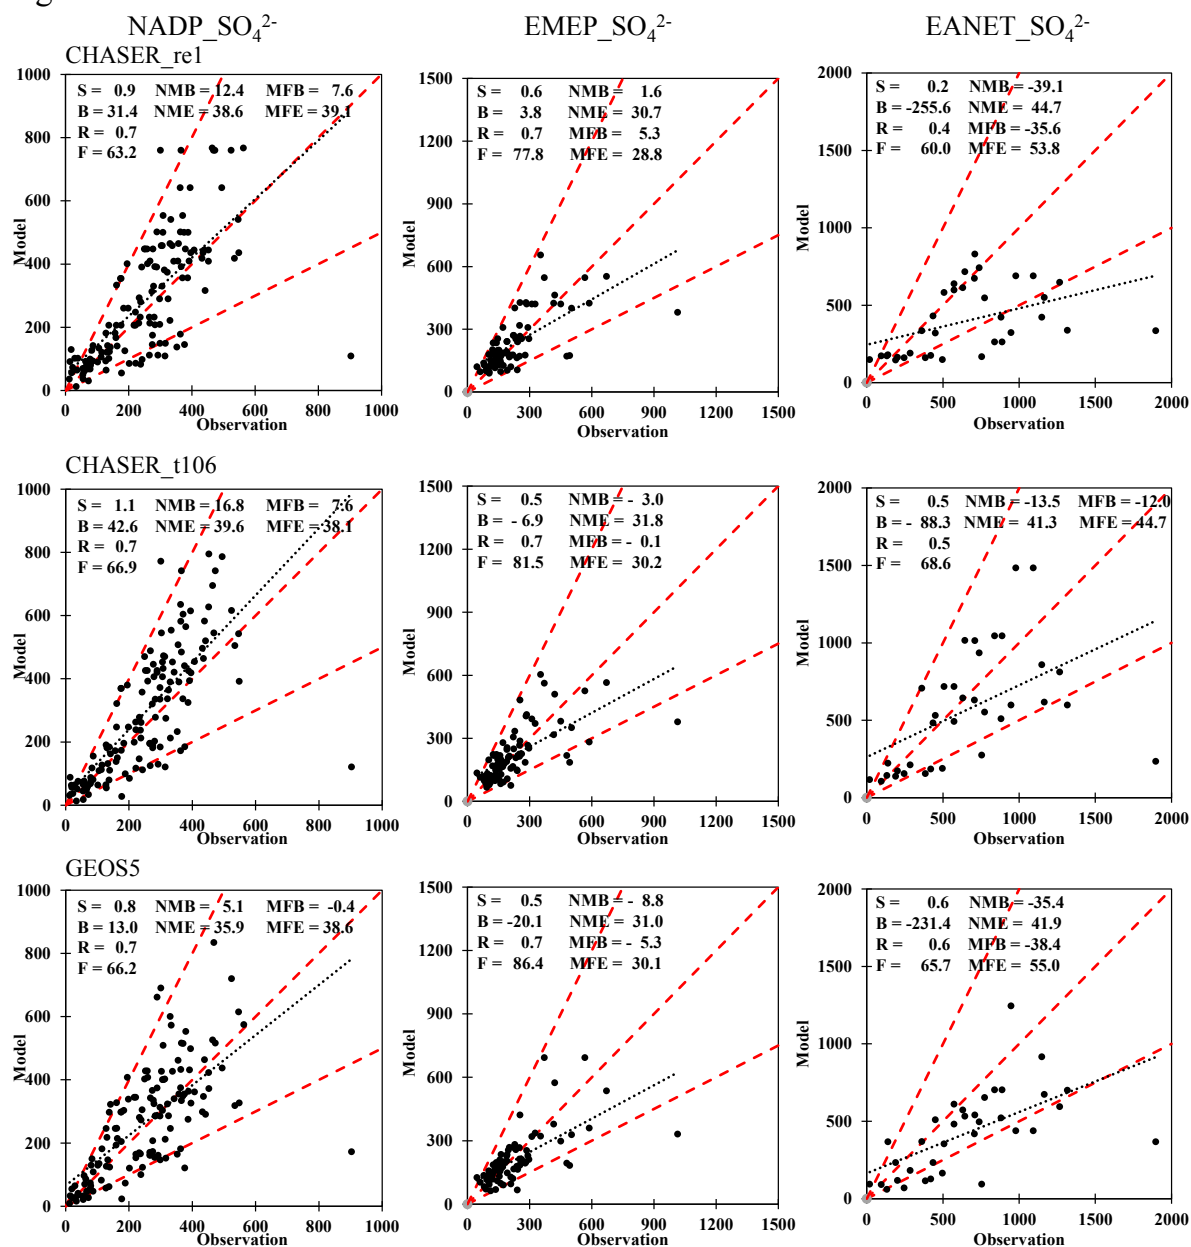

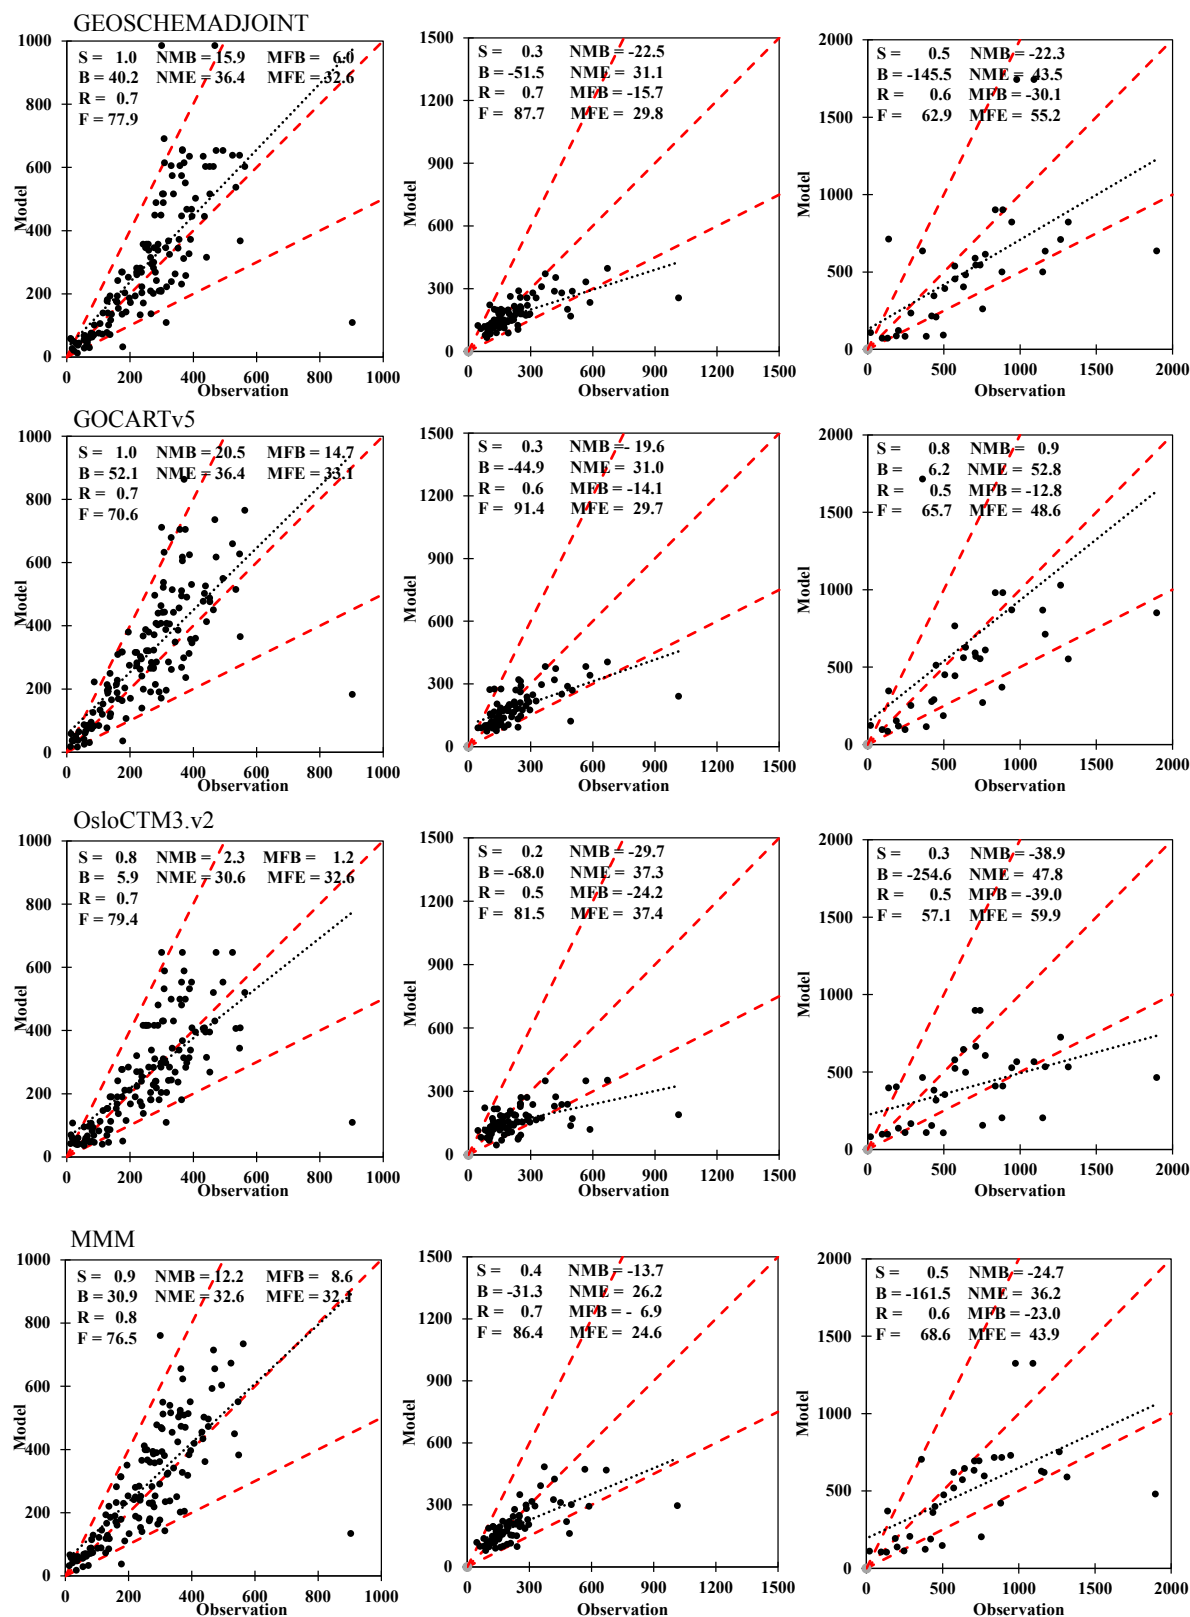

Fig. S2. Individual model performances on  $\text{SO}_4^{2-}$  wet deposition ( $\text{mg (S) m}^{-2}\text{yr}^{-1}$ ). The model result is the annual deposition in 2010 and the observation is 3-year average annual data of 2009-2011.

Fig. S3

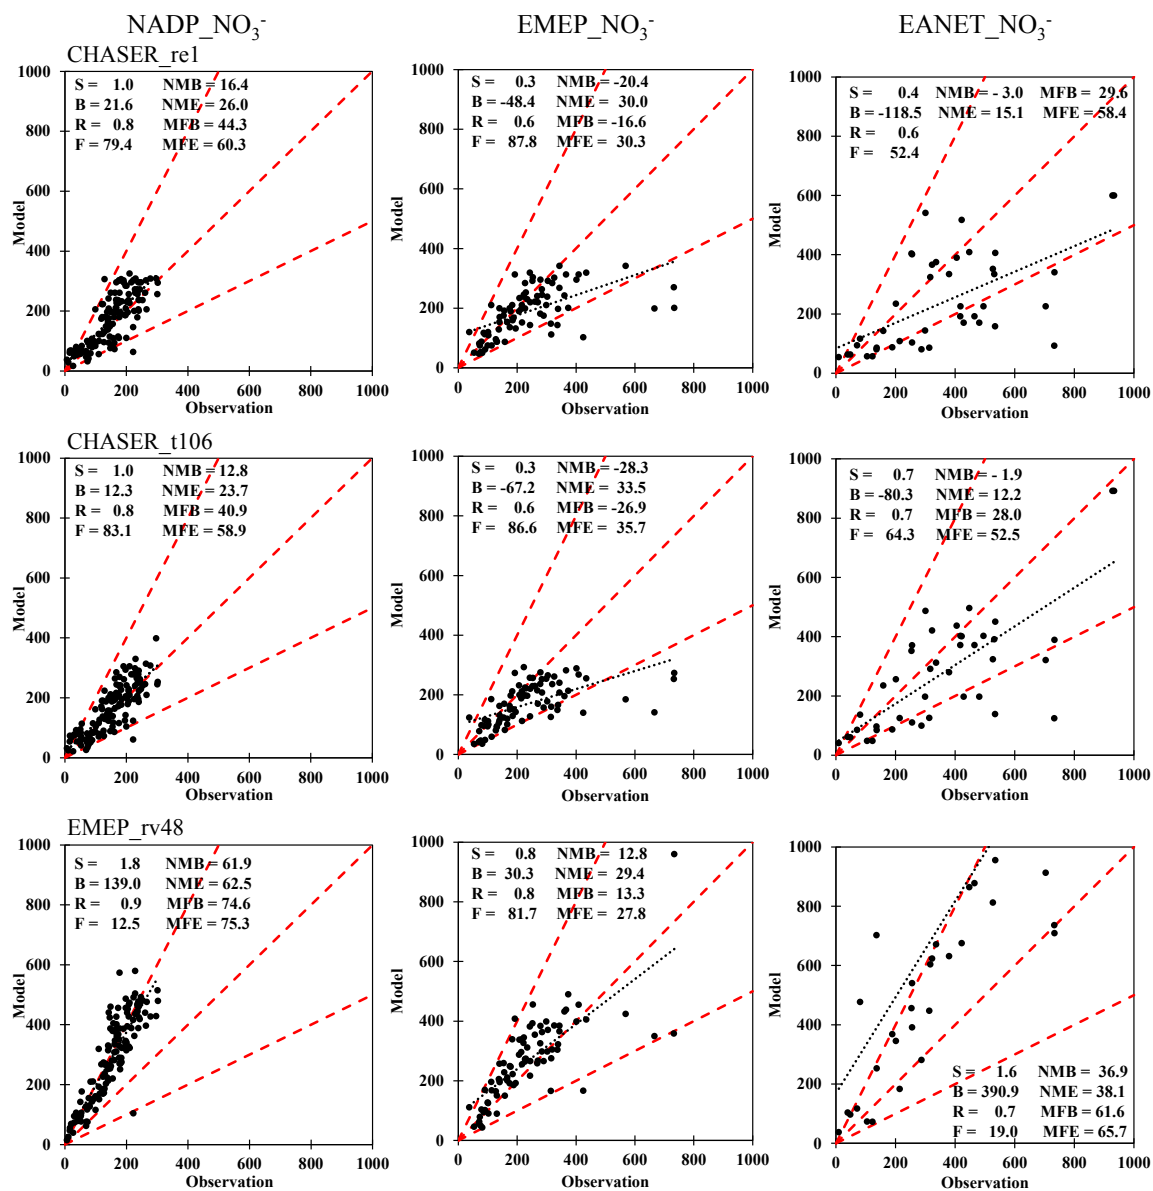

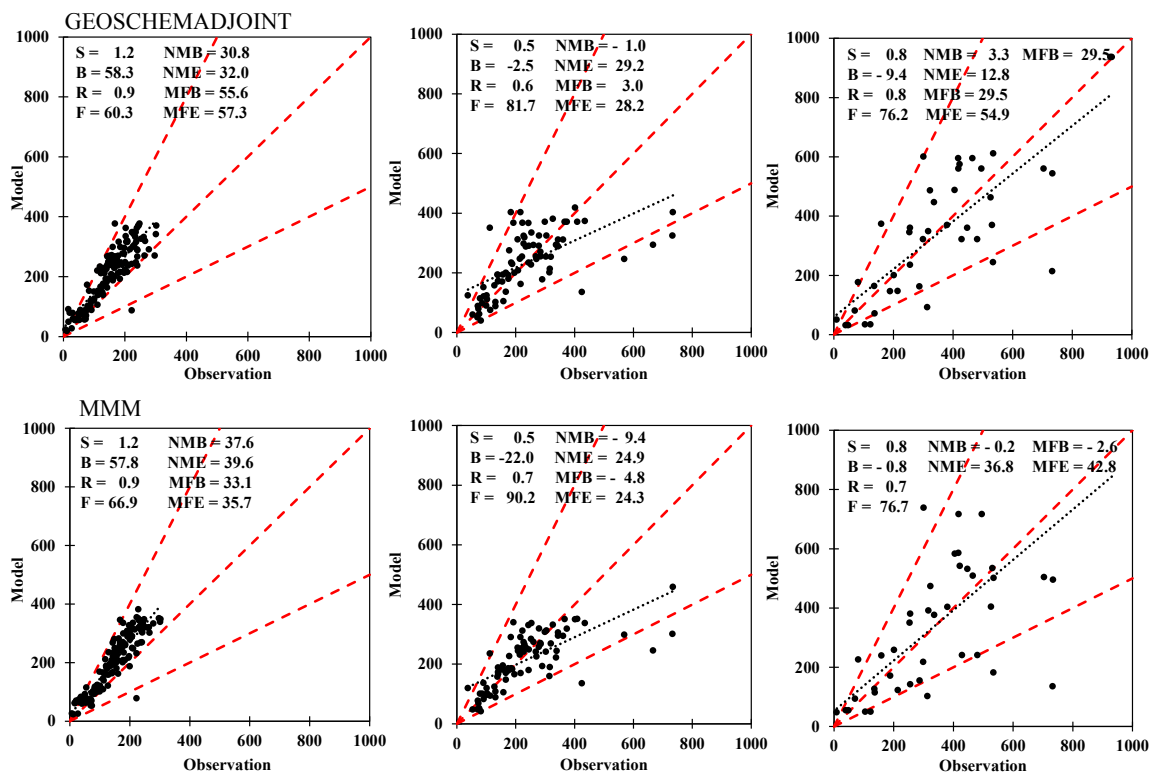

Fig. S3. Same as Fig. S2 but for  $\text{NO}_3^-$  wet deposition ( $\text{mg(N) m}^{-2}\text{yr}^{-1}$ )

Fig. S4

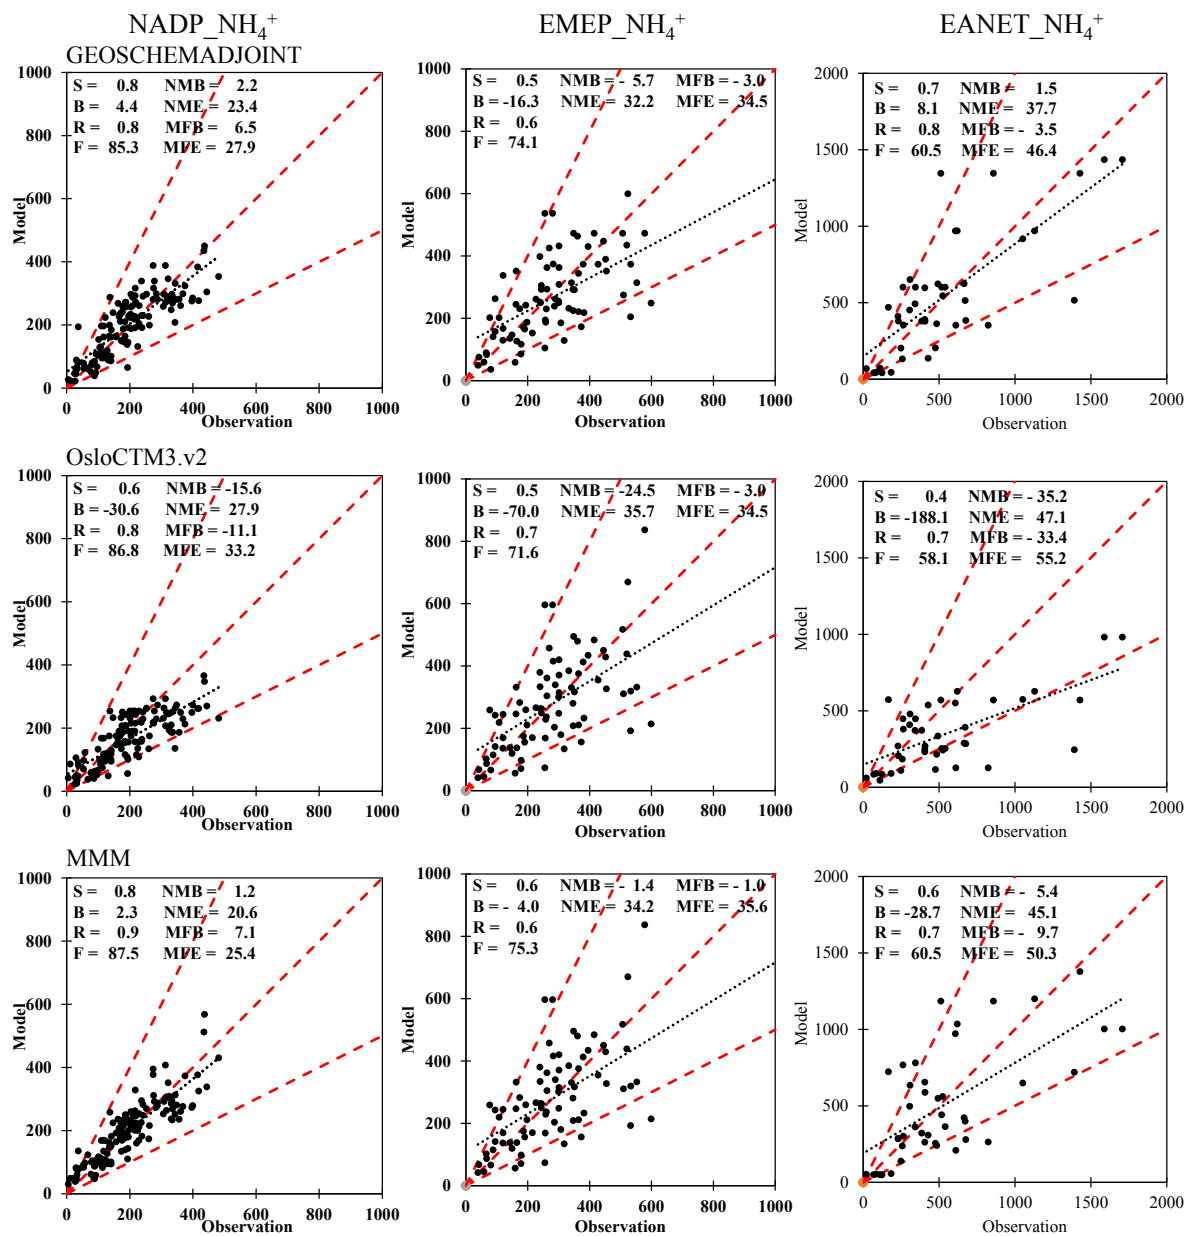

Fig. S4 Same as Fig. S2 but for  $\text{NH}_4^+$  wet deposition ( $\text{mg (N) m}^{-2}\text{yr}^{-1}$ )

Fig. S5

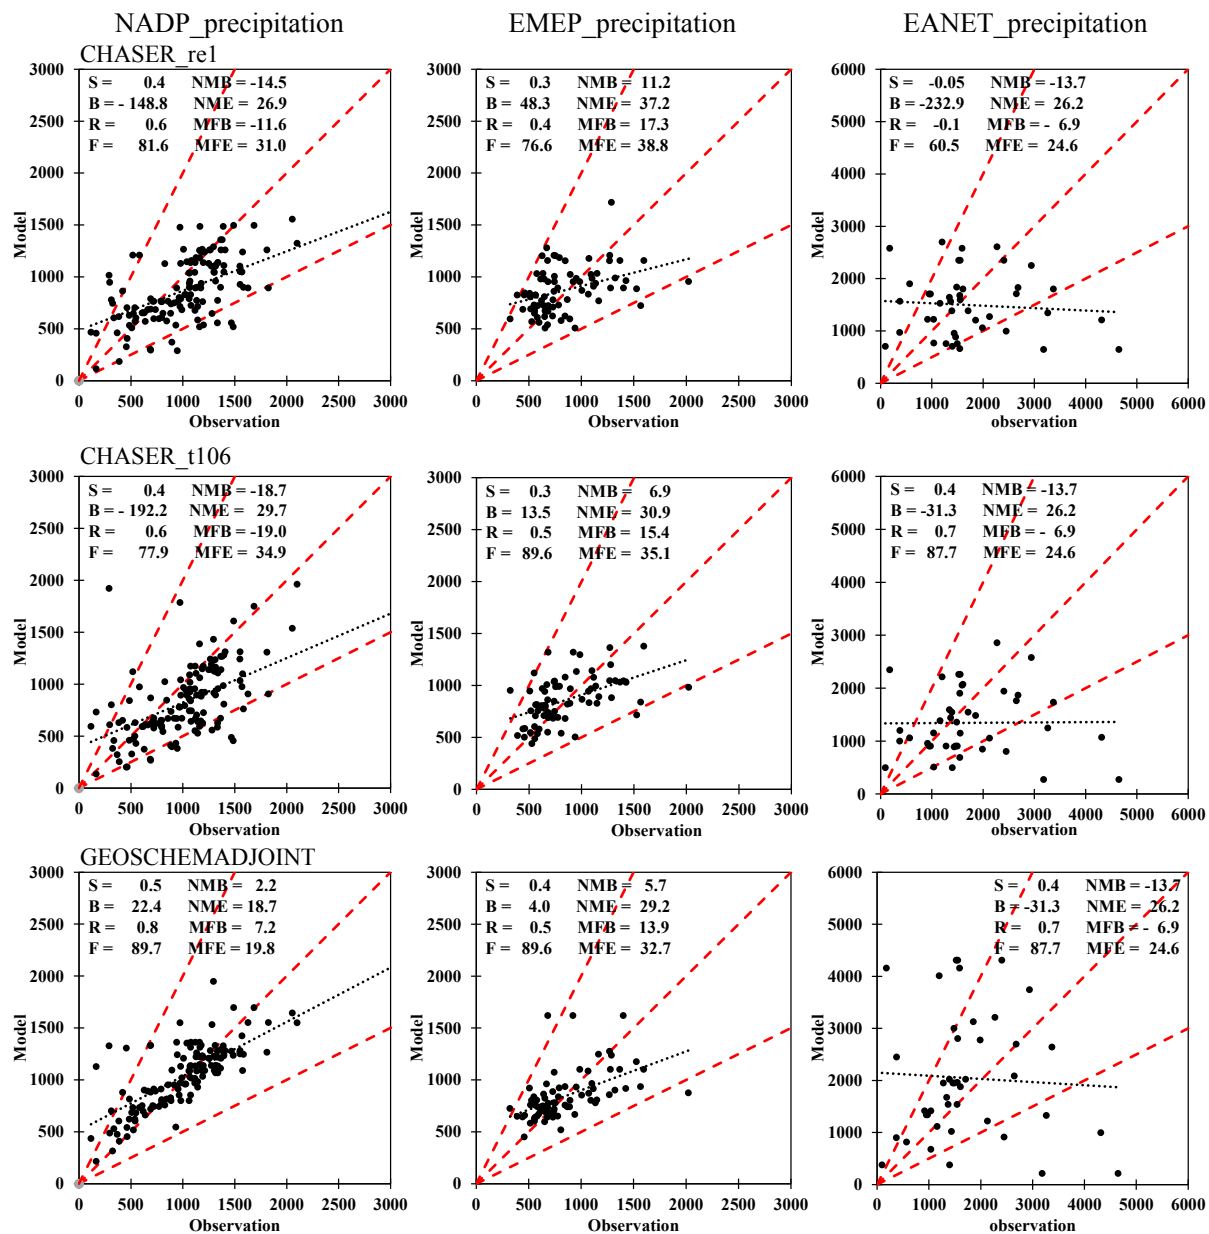

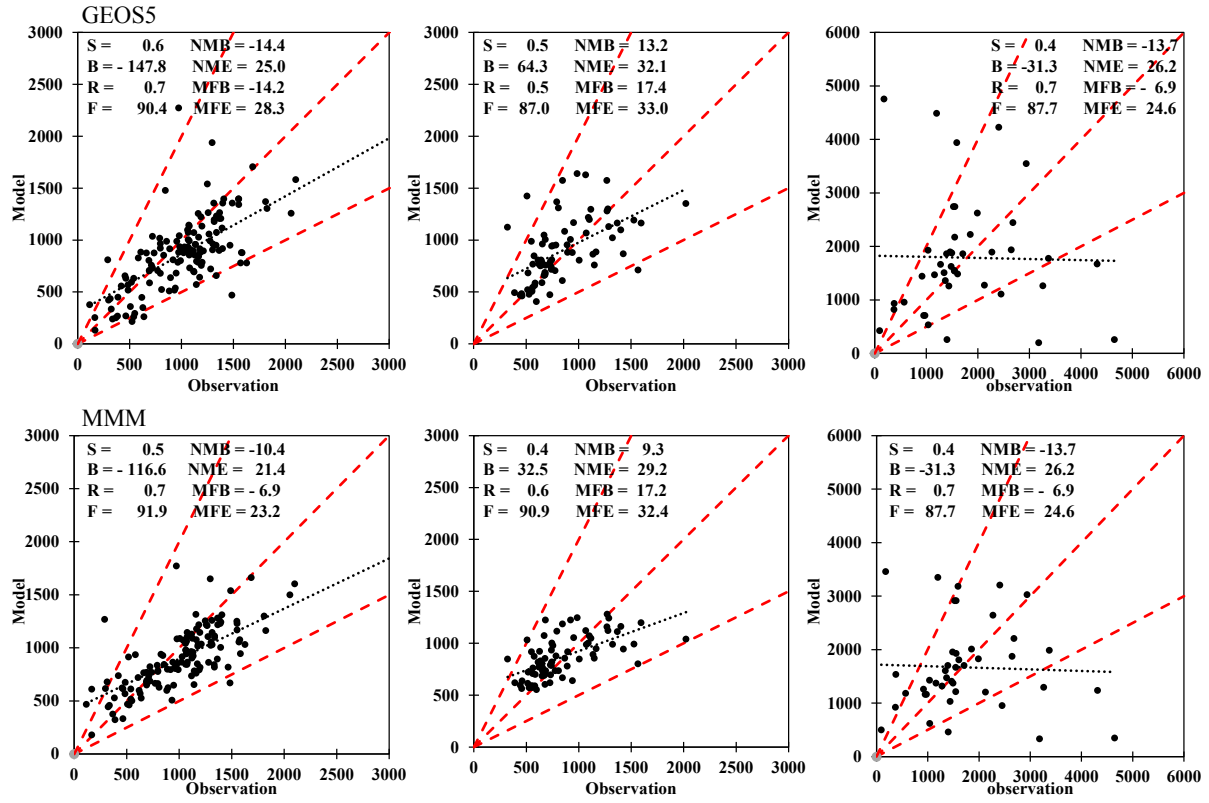

Fig. S5. Individual model performances on precipitation ( $\text{mm yr}^{-1}$ ). The model result is the annual precipitation in 2010 and the observation is 3-year average annual data of 2009-2011.

Fig. S6

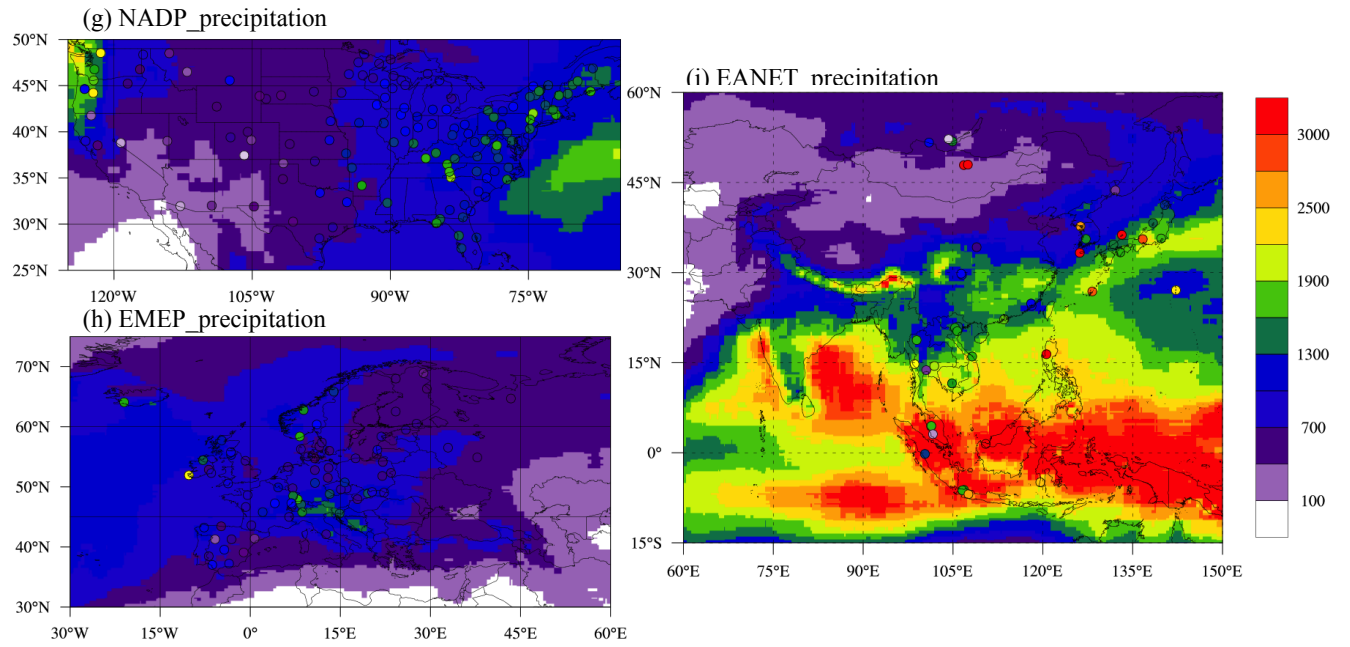

Fig. S6. Distribution of precipitation (mm yr<sup>-1</sup>) of MMM and observation. The MMM is the annual total precipitation in 2010 and the observation is 3-year average annual data of 2009-2011. Contours are MMM results and filled circles are observation.

Fig. S7

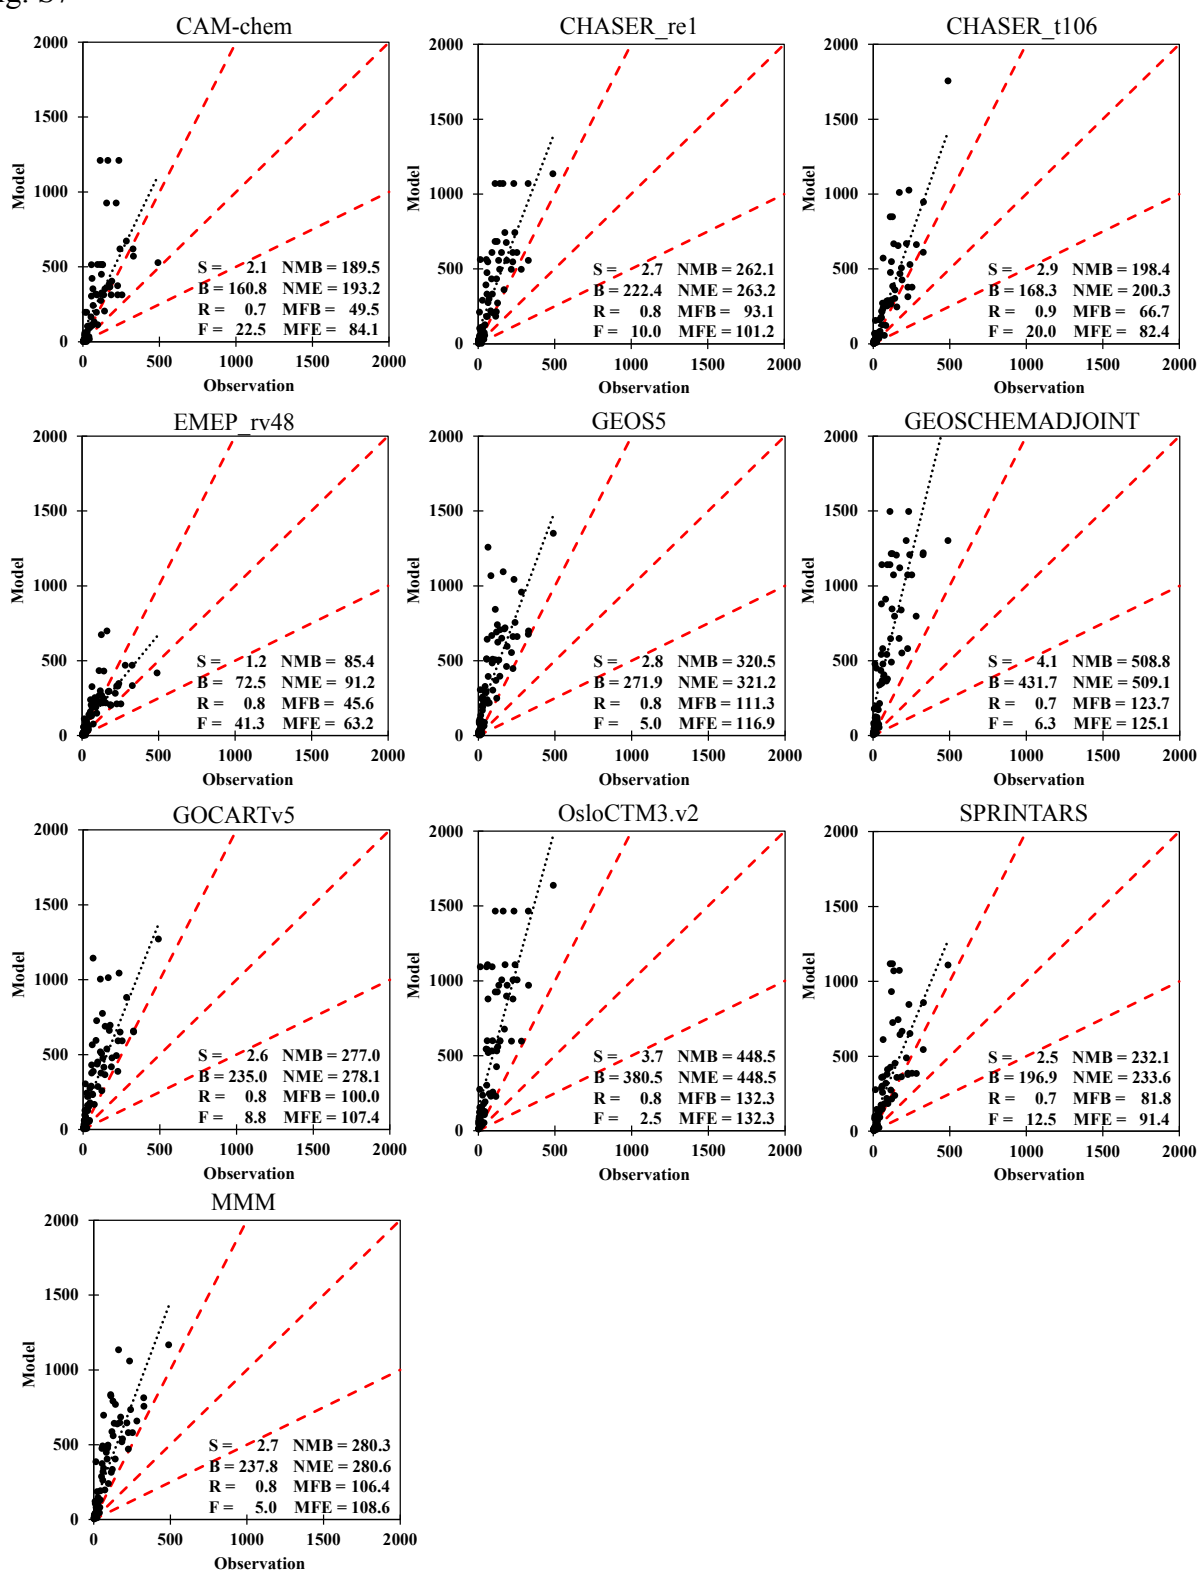

Fig. S7. Individual model performances on SO<sub>2</sub> dry deposition (mg (S) m<sup>-2</sup>yr<sup>-1</sup>). The model result is the annual deposition in 2010 and the observation is 3-year average annual data of 2009-2011.

Fig. S8

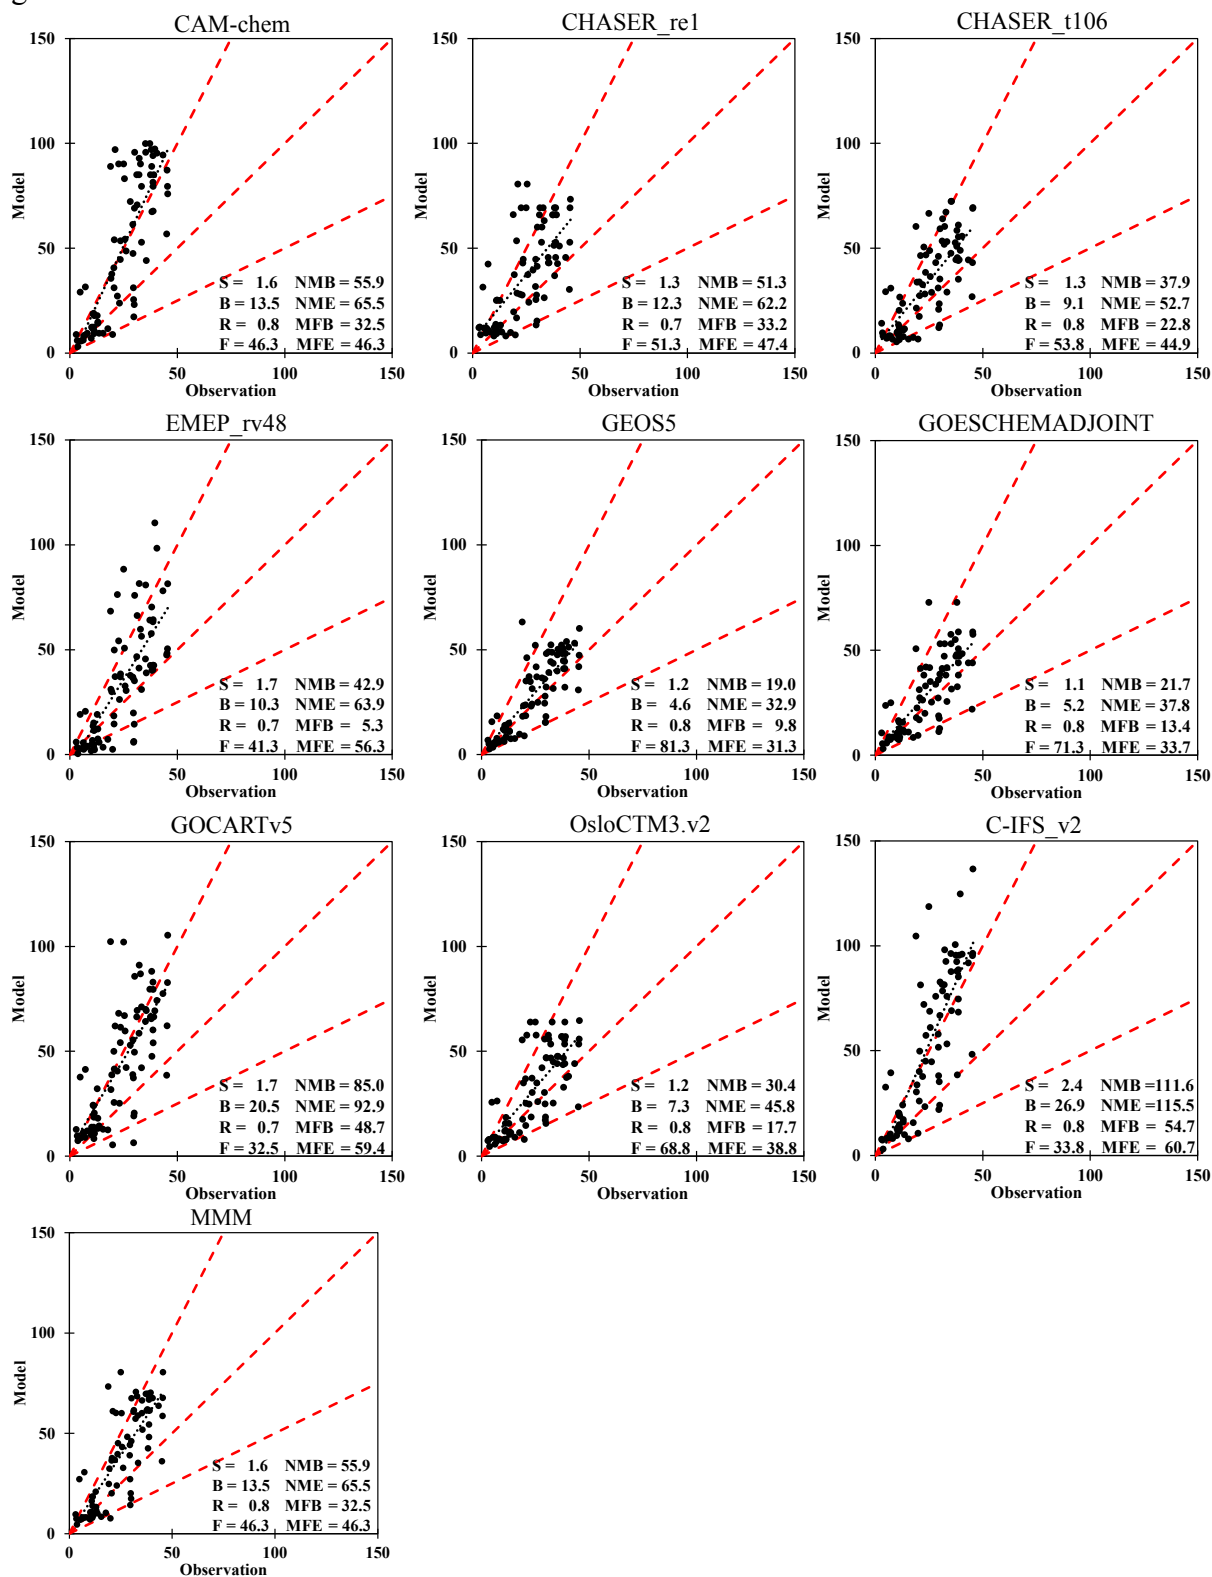

Fig. S8. Same as Fig. S7 but for  $\text{SO}_4^{2-}$  dry deposition ( $\text{mg (S) m}^{-2}\text{yr}^{-1}$ )

Fig. S9

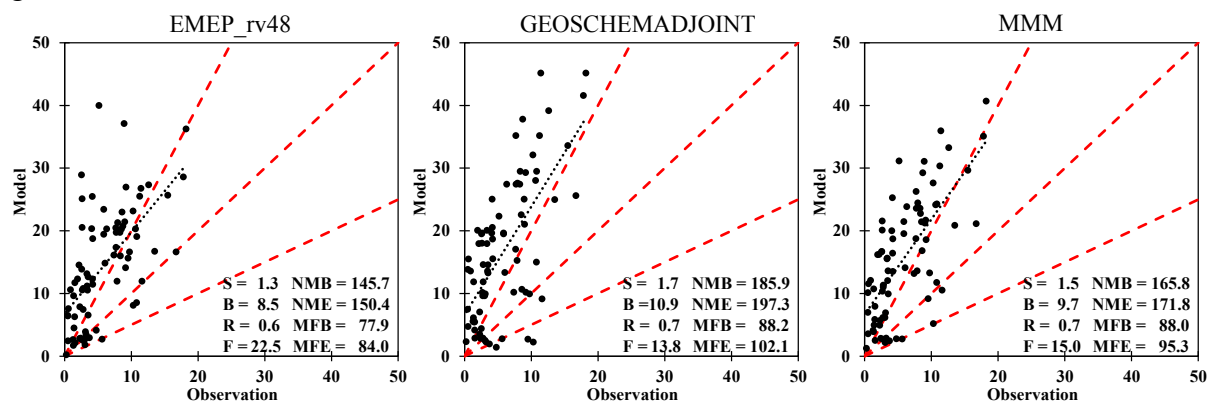

Fig. S9. Same as Fig. S7 but for  $\text{NO}_3^-$  dry deposition ( $\text{mg (N) m}^{-2}\text{yr}^{-1}$ )

Fig. S10

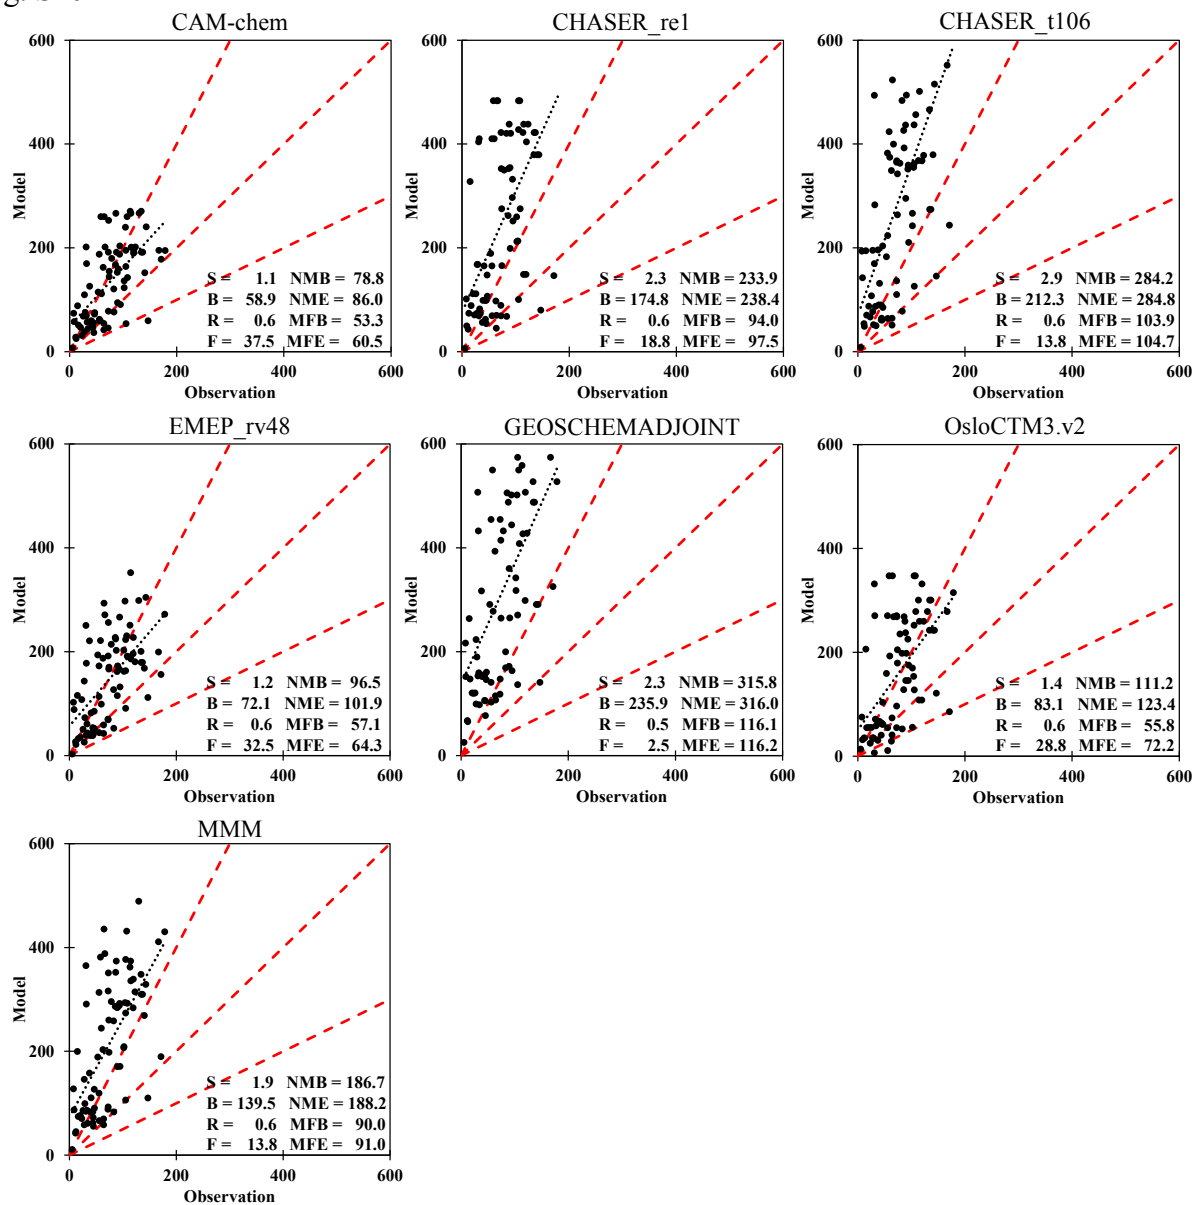

Fig. S10. Same as Fig. S7 but for  $\text{HNO}_3$  dry deposition ( $\text{mg (N) m}^{-2}\text{yr}^{-1}$ )

Fig. S11

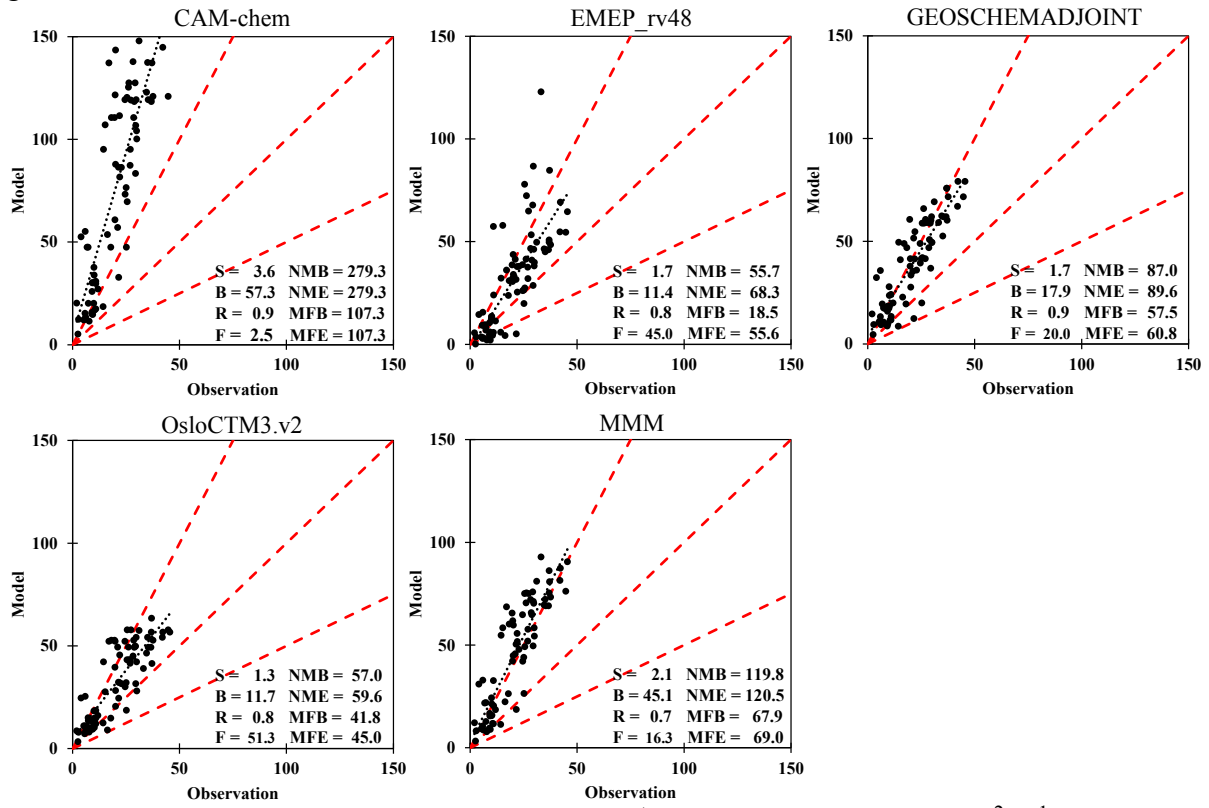

Fig. S11. Same as Fig. S7 but for  $\text{NH}_4^+$  dry deposition ( $\text{mg (N) m}^{-2}\text{yr}^{-1}$ )

Fig. S12

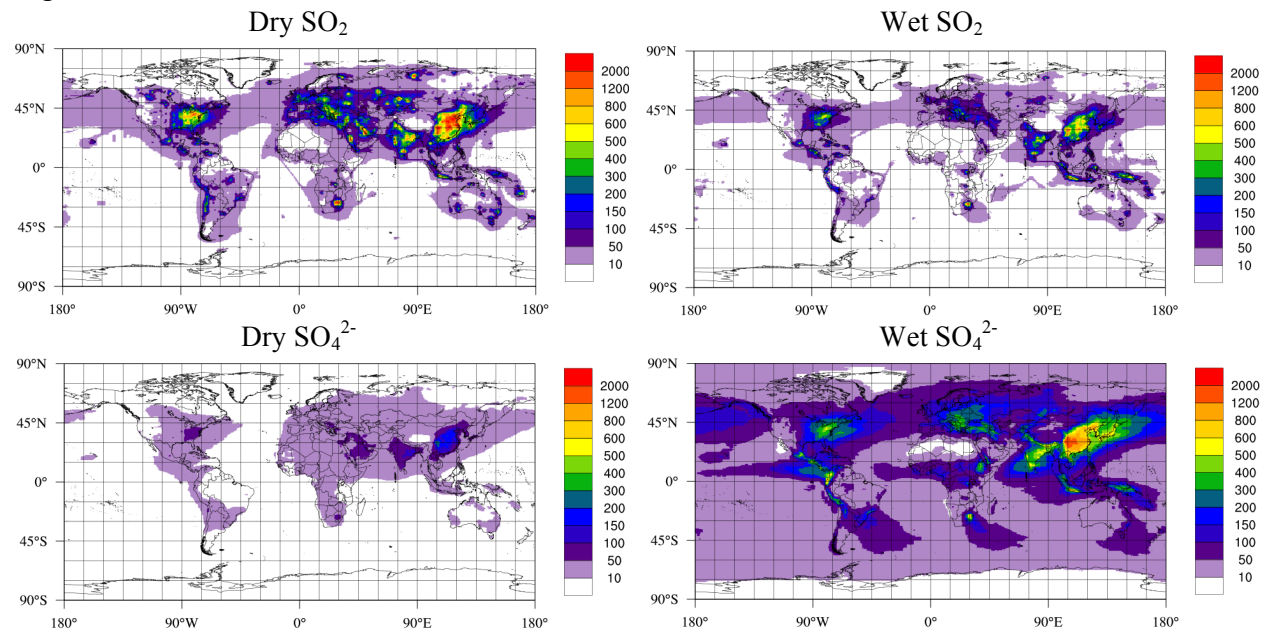

Fig. S12 Spatial distribution of  $\text{SO}_2$  and  $\text{SO}_4^{2-}$  deposition in 2010 from MMM results ( $\text{mg(S) m}^{-2} \text{yr}^{-1}$ ).

Fig. S13

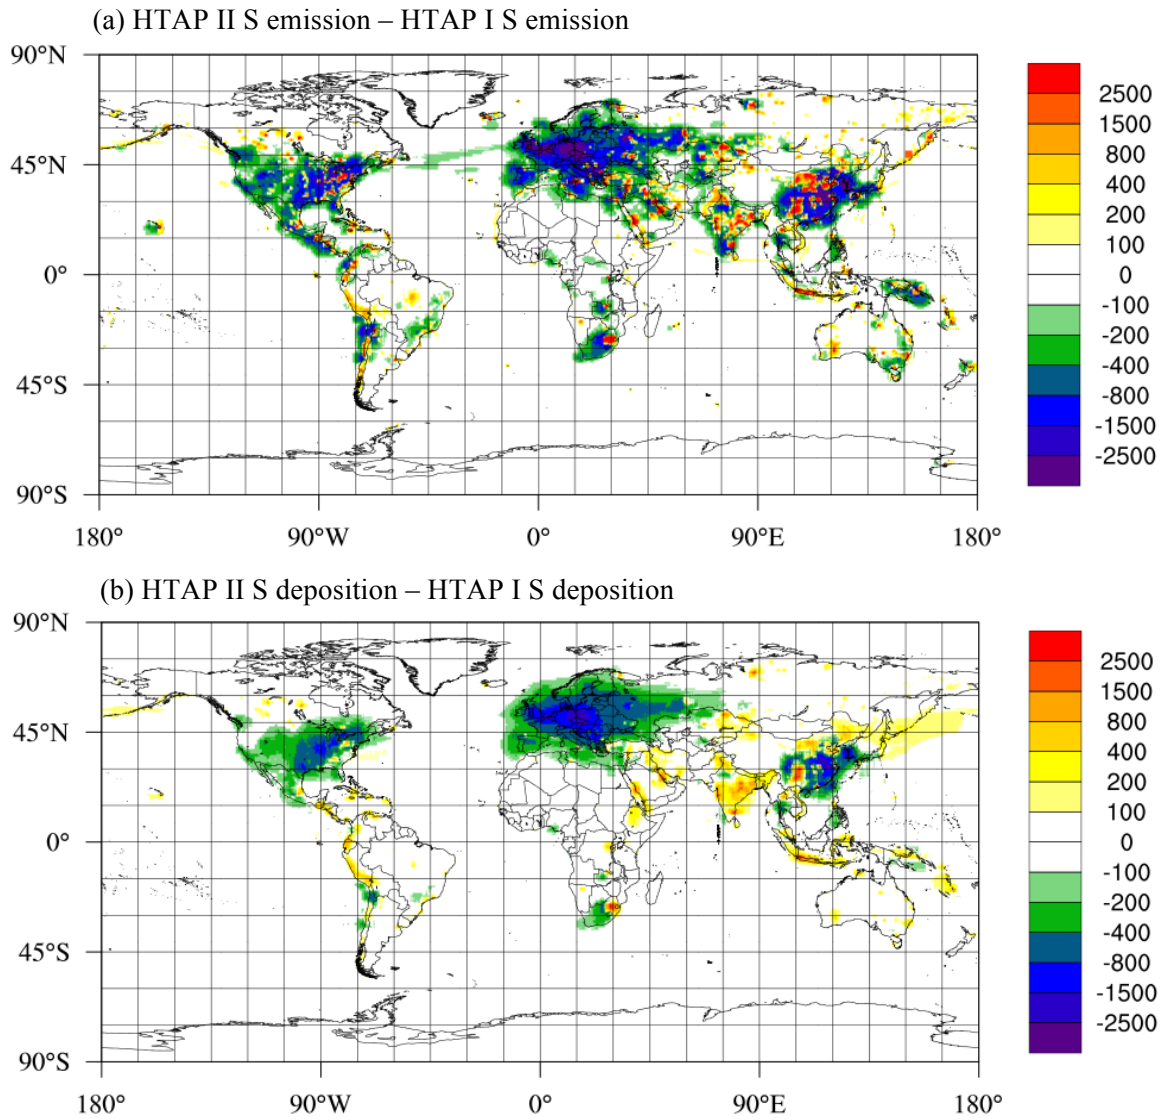

Fig. S13 Difference between MMM of HTAP II and HTAP I for (a) S emission (b) S Deposition.  
Unit:  $\text{mg(S)} \text{ m}^{-2} \text{ yr}^{-1}$ .

Fig. S14

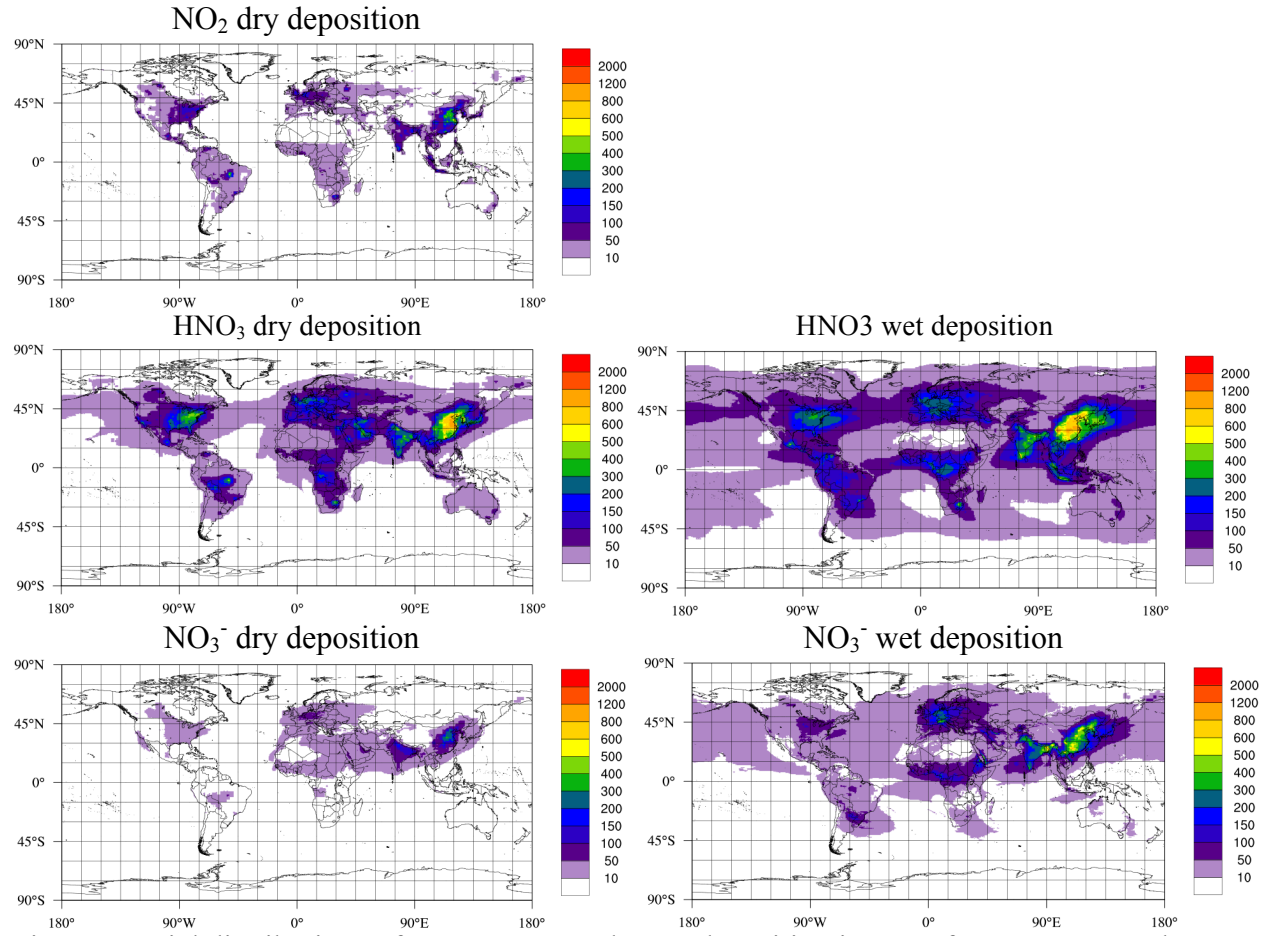

Fig. 14 Spatial distributions of NO<sub>2</sub>, HNO<sub>3</sub> and NO<sub>3</sub><sup>-</sup> deposition in 2010 from MMM results (mg(N) m<sup>-2</sup> yr<sup>-1</sup>).

Fig. S15

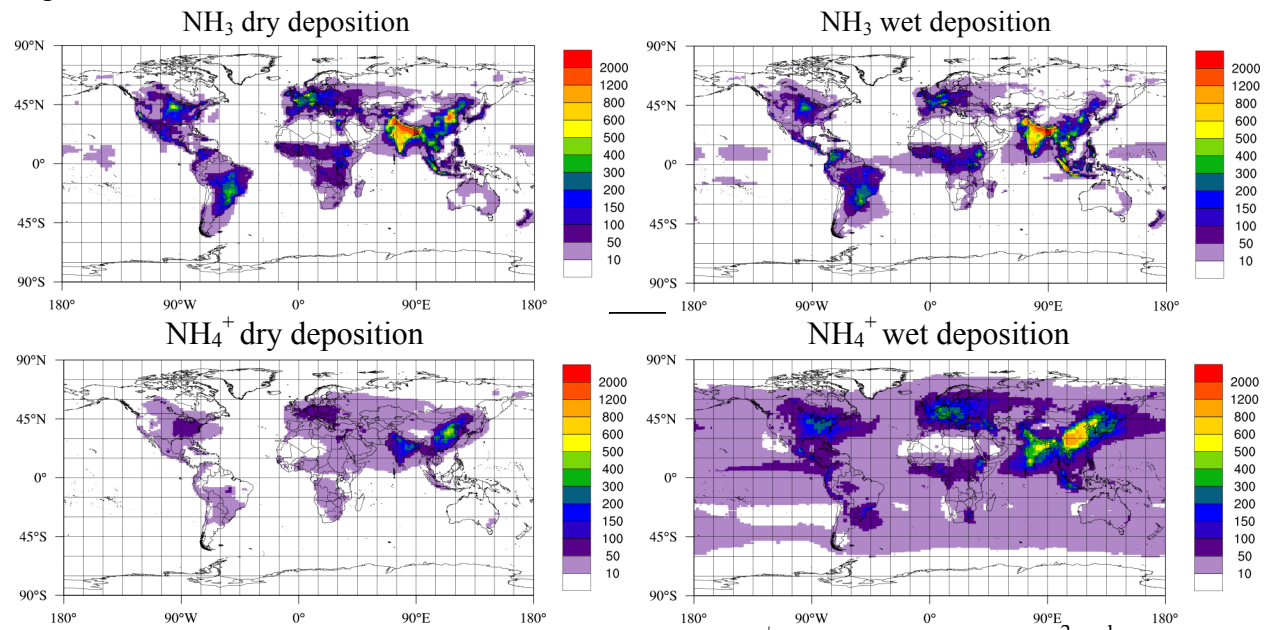

Fig. S15 Same as Fig. S14 but for  $\text{NH}_3$  and  $\text{NH}_4^+$  deposition ( $\text{mg(N) m}^{-2}\text{yr}^{-1}$ )

Fig. S16

(a) HTAP II N emission – HTAP I N emission

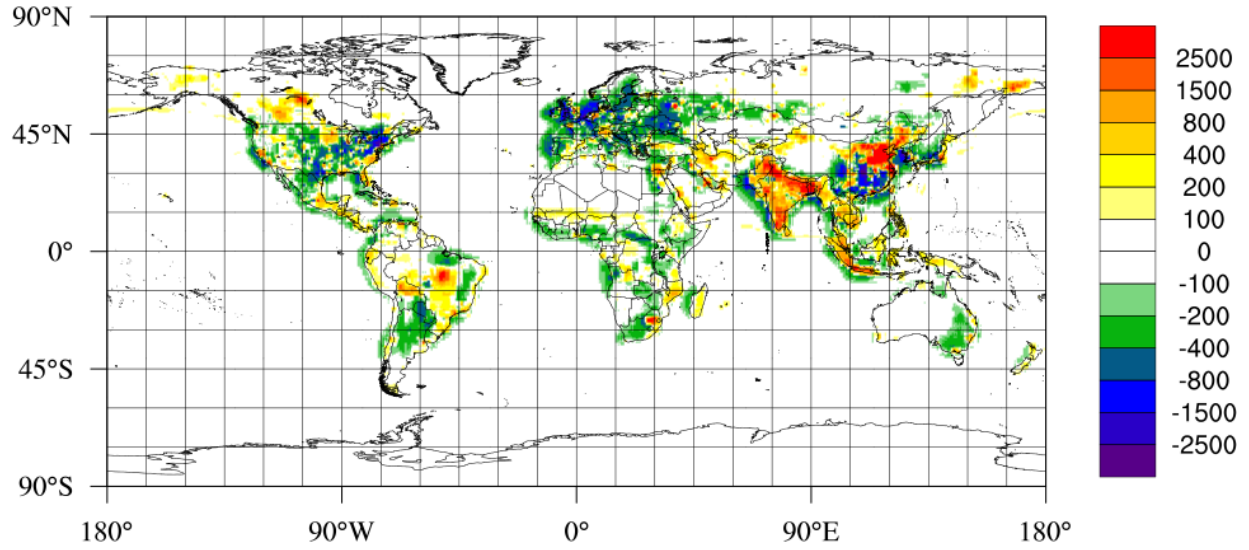

(b) HTAP II N deposition – HTAP I N deposition

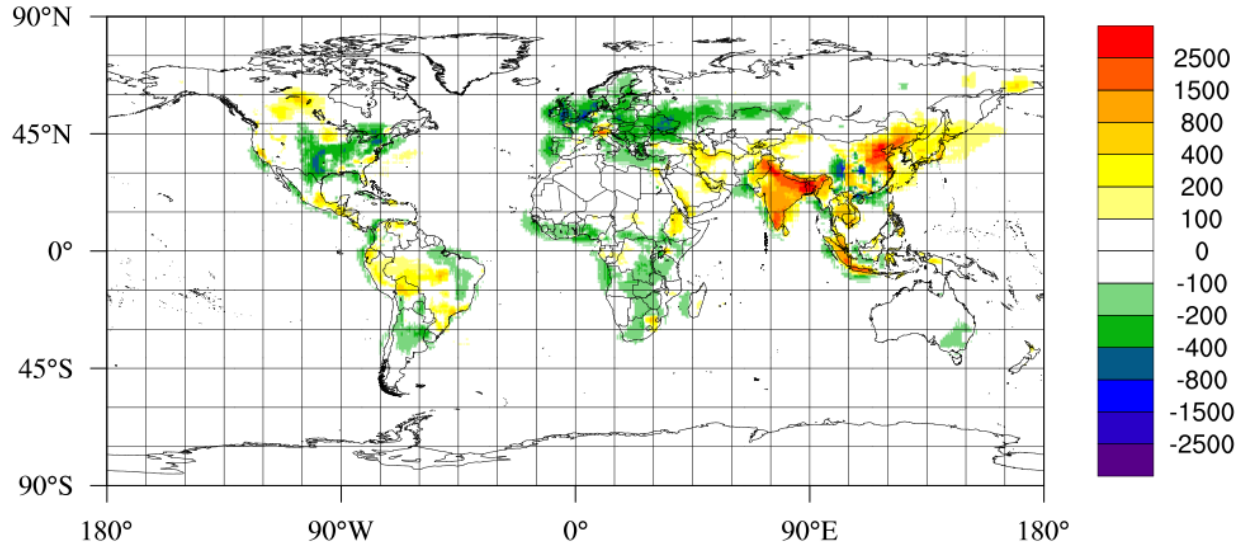

Fig. S16 Difference between MMM of HTAP II and HTAP I for (a) N emission (b) N Deposition.  
Unit:  $\text{mg(N) m}^{-2} \text{yr}^{-1}$

Fig. S17

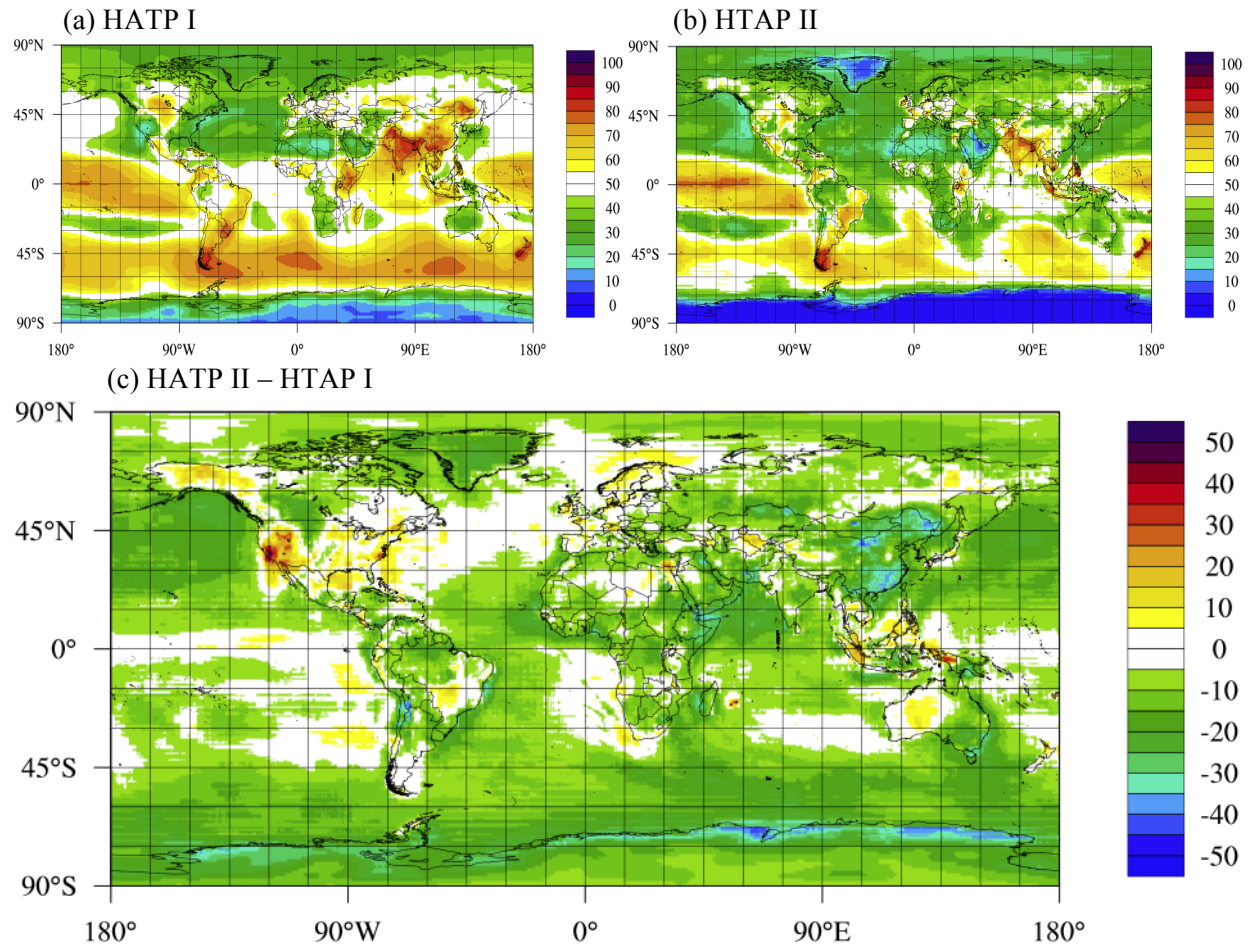

Fig. S17 Ratio of  $\text{NH}_x$  deposition in  $\text{N}$  ( $\text{NO}_y + \text{NH}_x$ ) deposition from MMM results of (a) HTAP I (b) HTAP II. (c) HTAP II – HTAP I. Unit: %.

Table S1

Table S1. Summary of Global Total Deposition and Emission of S in 2010 (Tg(S) yr<sup>-1</sup>)

| Model/Species   | Dry deposition | Wet deposition | Total Deposition | Emission surface SO <sub>2</sub> | Emission surface SO <sub>4</sub> <sup>2-</sup> | Emission DMS | Total Emission |
|-----------------|----------------|----------------|------------------|----------------------------------|------------------------------------------------|--------------|----------------|
| CAM-chem        | 18             | -              | -                | 55                               | -                                              | 28           | 83             |
| CHASER_re1      | 25             | 54             | 79               | 55                               | -                                              | 25           | 80             |
| CHASER_t106     | 23             | 53             | 77               | 55                               | -                                              | 23           | 78             |
| EMEP_rv48       | 16             | 42             | 58               | -                                | -                                              | -            | -              |
| GEMMACH         | -              | -              | -                | 66                               | -                                              | -            | -              |
| GEOS5           | 34             | 43             | 77               | 53                               | 2                                              | 31           | 85             |
| GEOSCHEMADJOINT | 32             | 52             | 85               | 62                               | 1                                              | -            | -              |
| OsloCTM3.v2     | 40             | 63             | 103              | 77                               | 2                                              | -            | -              |
| GOCARTv5        | 29             | 47             | 76               | 66                               | 2                                              | -            | -              |
| SPRINTARS       | 26             | -              | -                | 60                               | 1                                              | 22           | 84             |
| C-IFS_v2        | -              | -              | -                | 77                               | -                                              | -            | 77             |
| Multimodel mean | 28             | 56             | 84               | 62                               | 1                                              | 27           | 91             |

Note: S deposition is the sum of SO<sub>2</sub>, SO<sub>4</sub><sup>2-</sup>, Methanesulfonic acid (MSA) and Dimethyl sulfide (DMS) deposition. S emission is the sum of SO<sub>2</sub>, SO<sub>4</sub><sup>2-</sup> (sulfate dry aerosol particles due to emission) and Dimethyl sulfide (DMS) emission.

Table S2

Table S2. Summary of Global Total Deposition and Emission of NO<sub>y</sub> in 2010 (Tg(N) yr<sup>-1</sup>)

| Model/Species   | Dry deposition | Wet deposition | Total Deposition | Emis NO <sub>x</sub> | Emis INO <sub>x</sub> | Total Emission |
|-----------------|----------------|----------------|------------------|----------------------|-----------------------|----------------|
| CAM-chem        | 16             | -              | -                | -                    | 4                     | -              |
| CHASER_re1      | 23             | 28             | 51               | 57                   | 4                     | 60             |
| CHASER_t106     | 25             | 27             | 52               | 58                   | 5                     | 63             |
| EMEP_rv48       | 15             | 45             | 59               | -                    | -                     | -              |
| GEMMACH         | -              | -              | -                | 44                   | -                     | 44             |
| GEOSCHEMADJOINT | 26             | 28             | 54               | 54                   | -                     | 54             |
| OsloCTM3.v2     | 25             | -              | -                | 51                   | -                     | 51             |
| Multimodel mean | 22             | 38             | 59               | 57                   | 4                     | 60             |

Note: NO<sub>y</sub> deposition is the sum of all simulated oxidized nitrogen species (expressed as nitrogen) including NO, NO<sub>2</sub>, HNO<sub>3</sub>, HNO<sub>4</sub>, NO<sub>3</sub>aerosol, NO<sub>3</sub>(radical), N<sub>2</sub>O<sub>5</sub>, Peroxyacyl nitrates (PAN), other organic nitrates other than PAN, but not N<sub>2</sub>O (Orgn) deposition. NO<sub>x</sub> emission is sum of anthropogenic NO<sub>x</sub> emission, aircraft NO emission, soil NO emission and lightening NO<sub>x</sub> emission (INO<sub>x</sub>).

Table S3

Table S3. Summary of Global Total Deposition and Emission of  $\text{NH}_x$  in 2010 ( $\text{Tg(N) yr}^{-1}$ )

| Model/Species   | Dry deposition |                 | Wet deposition |                 | Total Deposition | Emission |
|-----------------|----------------|-----------------|----------------|-----------------|------------------|----------|
|                 | $\text{NH}_3$  | $\text{NH}_4^+$ | $\text{NH}_3$  | $\text{NH}_4^+$ |                  |          |
| CAM-chem        | 12             | 8               | -              | -               | -                | 54       |
| EMEP_rv48       | 11             | 3               | 13             | -               | -                | -        |
| GEOSCHEMADJOINT | 14             | 4               | 13             | 24              | 55               | 55       |
| OsloCTM3.v2     | 19             | 4               | -              | 21              | -                | 54       |
| Multimodel mean | 14             | 5               | 13             | 22              | 54               | 54       |

Note:  $\text{NH}_x$  deposition is the sum of  $\text{NH}_3$  and  $\text{NH}_4^+$  deposition.  $\text{NH}_x$  emission is  $\text{NH}_3$  emission.

Table S4

Table S4. Multi-model performance on simulating SO<sub>2</sub> concentration at CASTNET sites. The unit is µg (S) m<sup>-3</sup>.

| Species            | CAM-chem    | CHASER_re1  | CHASER_t106 | EMEP_rv48   | GEOSCHEMAD<br>JOINT | GOCART      | OsloCTM3<br>.v2 | SPRINTARS   | MMM    |
|--------------------|-------------|-------------|-------------|-------------|---------------------|-------------|-----------------|-------------|--------|
| mean obs           | 0.82        | 0.82        | 0.82        | 0.82        | 0.82                | 0.82        | 0.82            | 0.82        | 0.82   |
| mean model         | 5.31        | 5.79        | 5.51        | 1.71        | 5.36                | 2.49        | 4.61            | 1.72        | 4.06   |
| Linear Fit Slope   | 6.77        | 6.65        | 7.90        | 2.22        | 6.33                | 2.90        | 5.43            | 2.03        | 5.03   |
| mean bias          | 0.00        | 0.00        | 0.00        | 0.00        | 0.00                | 0.00        | 0.00            | 0.00        | 0.00   |
| Bias <sup>1</sup>  | 546.66      | 604.77      | 570.95      | 107.92      | 553.04              | 203.68      | 460.86          | 109.94      | 394.73 |
| R                  | 0.79        | 0.81        | 0.84        | 0.89        | 0.76                | 0.88        | 0.84            | 0.76        | 0.90   |
| F                  | 12.50       | 6.25        | 12.50       | 31.25       | 16.25               | 21.25       | 15.00           | 43.75       | 11.25  |
| NMB                | 546.66      | 604.77      | 570.95      | 107.92      | 553.04              | 203.68      | 460.86          | 109.94      | 394.73 |
| NME                | 548.91      | 606.20      | 573.30      | 116.37      | 554.09              | 208.21      | 462.33          | 117.67      | 396.47 |
| MFB                | 104.46      | 119.52      | 101.46      | 21.00       | 110.67              | 65.28       | 105.73          | 25.09       | 99.26  |
| MFE                | 116.11      | 125.36      | 110.97      | 69.95       | 113.81              | 88.82       | 111.67          | 61.69       | 106.31 |
| no of station      | 80          | 80          | 80          | 80          | 80                  | 80          | 80              | 80          | 80     |
| Spatial resolution | 1.9° × 2.5° | 2.8° × 2.8° | 1.1° × 1.1° | 0.5° × 0.5° | 2.0° × 2.5°         | 1.3° × 1.0° | 2.8° × 2.8°     | 1.1° × 1.1° |        |

<sup>1</sup> Bias is calculated as dividing Mean Bias with Mean Observation. The unit is %.

Table S5

Table S5. Same as Table S4 but for  $\text{SO}_4^{2-}$  concentration. The unit is  $\mu\text{g (S) m}^{-3}$ .

| Species            | CAM-chem                     | CHASER_re1                   | CHASER_t106                  | EMEP_rv48                    | GEOSCHEMADJOINT              | OsloCTM3.v2                  | MMM   |
|--------------------|------------------------------|------------------------------|------------------------------|------------------------------|------------------------------|------------------------------|-------|
| mean obs           | 0.64                         | 0.64                         | 0.64                         | 0.64                         | 0.64                         | 0.64                         | 0.64  |
| mean model         | 1.06                         | 1.24                         | 1.09                         | 0.74                         | 0.70                         | 0.52                         | 0.89  |
| Linear Fit Slope   | 1.97                         | 1.90                         | 1.80                         | 1.62                         | 1.17                         | 0.96                         | 1.57  |
| mean bias          | 0.00                         | 0.00                         | 0.00                         | 0.00                         | 0.00                         | 0.00                         | 0.00  |
| bias%              | 66.99                        | 94.61                        | 71.61                        | 16.30                        | 10.81                        | -18.18                       | 40.36 |
| R                  | 0.93                         | 0.84                         | 0.88                         | 0.92                         | 0.92                         | 0.87                         | 0.91  |
| F                  | 41.25                        | 26.25                        | 40.00                        | 57.50                        | 92.50                        | 82.50                        | 63.75 |
| NMB                | 66.99                        | 94.61                        | 71.61                        | 16.30                        | 10.81                        | -18.18                       | 40.36 |
| NME                | 72.20                        | 95.50                        | 73.78                        | 40.59                        | 23.01                        | 25.30                        | 46.73 |
| MFB                | 34.17                        | 59.16                        | 45.63                        | -18.17                       | 6.00                         | -32.63                       | 23.84 |
| MFE                | 46.67                        | 60.54                        | 49.32                        | 50.23                        | 23.21                        | 37.75                        | 33.98 |
| no of station      | 80                           | 80                           | 80                           | 80                           | 80                           | 80                           | 80    |
| Spatial resolution | $1.9^\circ \times 2.5^\circ$ | $2.8^\circ \times 2.8^\circ$ | $1.1^\circ \times 1.1^\circ$ | $0.5^\circ \times 0.5^\circ$ | $2.0^\circ \times 2.5^\circ$ | $2.8^\circ \times 2.8^\circ$ |       |

Table S6

Table S6. Same as Table S4 but for HNO<sub>3</sub> concentration. The unit is µg (N) m<sup>-3</sup>.

| Species            | CAM-chem    | CHASER_re1  | CHASER_t106 | EMEP_rv48   | GEOSCHEMADJOINT | OsloCTM3.v2 | MMM    |
|--------------------|-------------|-------------|-------------|-------------|-----------------|-------------|--------|
| mean obs           | 0.17        | 0.17        | 0.17        | 0.17        | 0.17            | 0.17        | 0.17   |
| mean model         | 0.64        | 0.83        | 0.71        | 0.36        | 0.64            | 0.14        | 0.55   |
| Linear Fit Slope   | 3.34        | 4.40        | 5.10        | 2.00        | 2.48            | 0.72        | 3.01   |
| mean bias          | 0.00        | 0.00        | 0.00        | 0.00        | 0.00            | 0.00        | 0.00   |
| bias%              | 264.73      | 376.04      | 309.11      | 106.39      | 264.54          | -19.82      | 216.83 |
| R                  | 0.78        | 0.65        | 0.82        | 0.85        | 0.74            | 0.76        | 0.84   |
| F                  | 3.75        | 2.50        | 1.25        | 28.75       | 1.25            | 76.25       | 3.75   |
| NMB                | 264.73      | 376.04      | 309.11      | 106.39      | 264.54          | -19.82      | 216.83 |
| NME                | 265.39      | 376.18      | 309.11      | 106.84      | 264.54          | 30.38       | 216.83 |
| MFB                | 107.09      | 117.52      | 105.97      | 60.13       | 113.19          | -27.44      | 98.66  |
| MFE                | 107.50      | 117.59      | 105.97      | 61.55       | 113.19          | 42.18       | 98.66  |
| no of station      | 80          | 80          | 80          | 80          | 80              | 80          | 80     |
| Spatial resolution | 1.9° × 2.5° | 2.8° × 2.8° | 1.1° × 1.1° | 0.5° × 0.5° | 2.0° × 2.5°     | 2.8° × 2.8° |        |

Table S7

Table S7. Same as Table S4 but for  $\text{NO}_3^-$  concentration. The unit is  $\mu\text{g (N) m}^{-3}$ .

| Species            | EMEP_rv48                    | GEOSCHEMADJOINT              | MMM    |
|--------------------|------------------------------|------------------------------|--------|
| mean obs           | 0.17                         | 0.17                         | 0.17   |
| mean model         | 0.17                         | 0.63                         | 0.40   |
| Linear Fit Slope   | 0.67                         | 2.58                         | 1.63   |
| mean bias          | 0.00                         | 0.00                         | 0.00   |
| bias%              | 0.05                         | 270.05                       | 135.05 |
| R                  | 0.80                         | 0.74                         | 0.77   |
| F                  | 65.00                        | 12.50                        | 17.50  |
| NMB                | 0.05                         | 270.05                       | 135.05 |
| NME                | 35.60                        | 279.48                       | 144.21 |
| MFB                | 2.19                         | 103.34                       | 76.92  |
| MFE                | 41.98                        | 113.85                       | 87.53  |
| no of station      | 80.0                         | 80                           | 80     |
| Spatial resolution | $0.5^\circ \times 0.5^\circ$ | $2.0^\circ \times 2.5^\circ$ |        |

Table S8

Table S8. Same as Table 4 but for  $\text{NH}_4^+$  concentration. The unit is  $\mu\text{g (N) m}^{-3}$ .

| Species            | EMEP_rv48                    | GEOSCHEMADJOINT              | MMM    |
|--------------------|------------------------------|------------------------------|--------|
| mean obs           | 0.56                         | 0.56                         | 0.56   |
| mean model         | 1.13                         | 1.94                         | 1.54   |
| Linear Fit Slope   | 2.00                         | 3.47                         | 2.74   |
| mean bias          | 0.00                         | 0.00                         | 0.00   |
| bias%              | 101.13                       | 244.46                       | 172.79 |
| R                  | 0.91                         | 0.94                         | 0.95   |
| F                  | 26.25                        | 1.25                         | 5.00   |
| NMB                | 101.13                       | 244.46                       | 172.79 |
| NME                | 101.89                       | 244.46                       | 172.79 |
| MFB                | 58.09                        | 106.87                       | 88.42  |
| MFE                | 59.91                        | 106.87                       | 88.42  |
| no of station      | 80                           | 80                           | 80     |
| Spatial resolution | $0.5^\circ \times 0.5^\circ$ | $2.0^\circ \times 2.5^\circ$ |        |

Table S9

Table S9. Comparison of dry deposition velocity of  $\text{SO}_2$  between models and CASTNET. The unit is  $\text{cm s}^{-1}$ .

|                  | CAM-chem | CHASER_rel | CHASER_t106 | EMEP_rv48 | GEOSCHEMADJOINT | GOCART | OsloCTM3.v2 | SPRINTARS | MMM   |
|------------------|----------|------------|-------------|-----------|-----------------|--------|-------------|-----------|-------|
| mean obs         | 0.27     | 0.27       | 0.27        | 0.27      | 0.27            | 0.27   | 0.27        | 0.27      | 0.27  |
| mean model       | 0.14     | 0.17       | 0.16        | 0.36      | 0.33            | 0.41   | 0.39        | 0.50      | 0.24  |
| Linear Fit Slope | 0.16     | 0.02       | -0.01       | -0.35     | 0.20            | 0.03   | -0.62       | 0.15      | 0.04  |
| mean bias        | -0.13    | -0.09      | -0.11       | 0.10      | 0.07            | 0.15   | 0.12        | 0.23      | -0.02 |
| bias%            | -47.79   | -34.88     | -41.44      | 35.54     | 25.05           | 54.32  | 46.08       | 87.86     | -8.39 |
| R                | 0.18     | 0.03       | -0.02       | -0.23     | 0.09            | 0.03   | -0.44       | 0.23      | 0.06  |
| F                | 36.25    | 60.00      | 53.75       | 56.25     | 70.00           | 42.50  | 50.00       | 30.00     | 77.50 |
| NMB              | -47.79   | -34.88     | -41.44      | 35.54     | 25.05           | 54.32  | 46.08       | 87.86     | -9.03 |
| NME              | 56.70    | 44.51      | 49.62       | 62.93     | 55.54           | 60.74  | 68.83       | 88.07     | 34.88 |
| MFB              | -67.47   | -39.46     | -48.79      | 27.96     | 16.61           | 45.18  | 36.33       | 65.08     | -3.83 |
| MFE              | 75.10    | 52.75      | 60.26       | 50.44     | 42.03           | 49.40  | 53.58       | 65.21     | 35.00 |
| no of station    | 80.00    | 80.00      | 80.00       | 80.00     | 80.00           | 80.00  | 80.00       | 80.00     | 80    |

Table S10

Table S10. Same as Table S9 but for dry deposition velocity of  $\text{SO}_4^{2-}$ 

|                  | CAM-chem | CHASER_rel | CHASER_t106 | EMEP_rv48 | GEOSCHEMADJOINT | OsloCTM3.v2 | MMM   |
|------------------|----------|------------|-------------|-----------|-----------------|-------------|-------|
| mean obs         | 0.13     | 0.13       | 0.13        | 0.13      | 0.13            | 0.13        | 0.13  |
| mean model       | 0.15     | 0.09       | 0.10        | 0.17      | 0.13            | 0.21        | 0.13  |
| Linear Fit Slope | 0.29     | 0.01       | -0.01       | 0.30      | 0.11            | 0.21        | 0.10  |
| mean bias        | 0.02     | -0.03      | -0.03       | 0.04      | 0.01            | 0.08        | 0.00  |
| Bias %           | 16.15    | -26.92     | -24.39      | 31.34     | 4.06            | 63.18       | 0.30  |
| R                | 0.42     | 0.07       | -0.16       | 0.17      | 0.28            | 0.27        | 0.34  |
| F                | 83.75    | 82.50      | 85.00       | 67.50     | 90.00           | 36.25       | 88.75 |
| NMB              | 16.15    | -26.92     | -24.39      | 31.34     | 4.06            | 63.18       | 0.30  |
| NME              | 26.38    | 32.21      | 30.95       | 45.91     | 22.36           | 63.67       | 21.12 |
| MFB              | 17.60    | -26.05     | -22.58      | 23.00     | 7.78            | 50.30       | 4.56  |
| MFE              | 26.19    | 34.91      | 33.14       | 37.74     | 22.75           | 50.56       | 21.73 |
| No of stations   | 80       | 80         | 80          | 80        | 80              | 80          | 80    |

Table S11

Table S11. Same as Table S9 but for dry deposition velocity of  $\text{HNO}_3$ 

|                  | CAM-chem | CHASER_re1 | CHASER_t10<br>6 | EMEP_rv48 | GEOSCHEM<br>ADJOINT | OsloCTM3.v2 | MMM   |
|------------------|----------|------------|-----------------|-----------|---------------------|-------------|-------|
| mean obs         | 1.34     | 1.34       | 1.34            | 1.34      | 1.34                | 1.34        | 1.34  |
| mean model       | 0.68     | 1.07       | 1.41            | 1.35      | 1.51                | 3.55        | 1.25  |
| Linear Fit Slope | 0.03     | 0.06       | -0.37           | -0.03     | -0.40               | -1.24       | -0.10 |
| mean bias        | -0.66    | -0.28      | 0.06            | 0.01      | 0.17                | 2.21        | -0.10 |
| Bias %           | -49.12   | -20.70     | 4.60            | 0.74      | 12.44               | 164.52      | -7.27 |
| R                | 0.10     | 0.05       | -0.28           | -0.03     | -0.29               | -0.38       | -0.12 |
| F                | 50.00    | 72.50      | 77.50           | 85.00     | 76.25               | 16.25       | 85.00 |
| NMB              | -49.12   | -20.70     | 4.60            | 0.74      | 12.44               | 164.52      | -7.27 |
| NME              | 49.92    | 34.65      | 36.69           | 29.96     | 38.75               | 165.99      | 27.47 |
| MFB              | -62.09   | -27.68     | 2.14            | -0.16     | 9.65                | 84.58       | -7.01 |
| MFE              | 63.78    | 42.88      | 37.23           | 30.98     | 36.88               | 85.84       | 29.52 |
| No of stations   | 80       | 80         | 80              | 80        | 80                  | 80          | 80    |

Table S12

Table S12. Same as Table S9 but for dry deposition velocity of  $\text{NO}_3^-$ 

|                  | EMEP_rv48 | GEOSCHEMADJOINT | MMM   |
|------------------|-----------|-----------------|-------|
| mean obs         | 0.12      | 0.12            | 0.12  |
| mean model       | 0.29      | 0.10            | 0.14  |
| Linear Fit Slope | 0.65      | 0.00            | 0.06  |
| mean bias        | 0.17      | -0.02           | 0.02  |
| Bias %           | 146.99    | -16.50          | 18.69 |
| R                | 0.26      | 0.00            | 0.05  |
| F                | 7.50      | 77.50           | 73.75 |
| NMB              | 146.99    | -16.50          | 18.69 |
| NME              | 147.73    | 40.11           | 37.35 |
| MFB              | 81.93     | -17.07          | 17.29 |
| MFE              | 82.58     | 38.99           | 32.05 |
| No of stations   | 80        | 80              | 80    |

Table S13

Table S13. Same as Table S9 but for dry deposition velocity of  $\text{NH}_4^+$ 

|                  | CAM-chem | GEOSCHEMADJOINT | MMM   |
|------------------|----------|-----------------|-------|
| mean obs         | 0.12     | 0.12            | 0.12  |
| mean model       | 0.22     | 0.06            | 0.12  |
| Linear Fit Slope | 0.38     | 0.06            | 0.13  |
| mean bias        | 0.10     | -0.06           | 0.00  |
| Bias             | 81.91    | -47.39          | -1.72 |
| R                | 0.40     | 0.23            | 0.27  |
| F                | 15.00    | 60.00           | 87.50 |
| NMB              | 81.91    | -47.39          | -1.72 |
| NME              | 82.81    | 48.76           | 22.13 |
| MFB              | 60.11    | -57.09          | 2.01  |
| MFE              | 60.62    | 59.99           | 22.67 |
| No of stations   | 80       | 80              | 80    |
